# Supplementary material
Source: PubMed Central journal article supplement (PMC5963867)
Supplement: develop-145-160622-s1.pdf [file develop-145-160622-s1.pdf]

FIG. S1

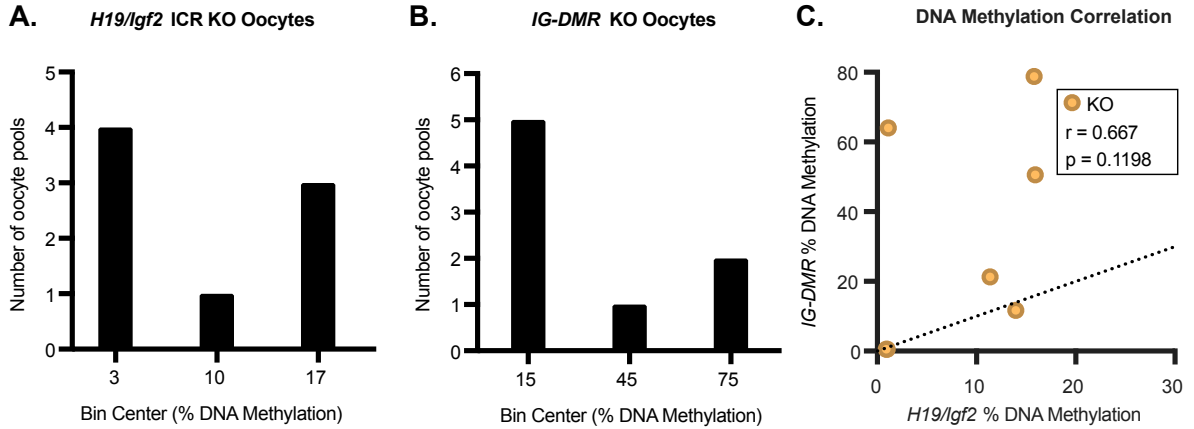

**Supplemental Figure 1. Further characterization of oocyte DNA methylation.** The DNA methylation data from Figure 1 (A) KO oocytes at the *H19/Igf2* ICR and (B) KO oocytes at the *IG-DMR* are plotted as histograms. (C) Correlation plot between KO oocyte pools at the *H19/Igf2* ICR versus the *IG-DMR*.  $r$  = Spearman correlation coefficient. Dashed line represents a hypothetical perfect correlation.

FIG. S2

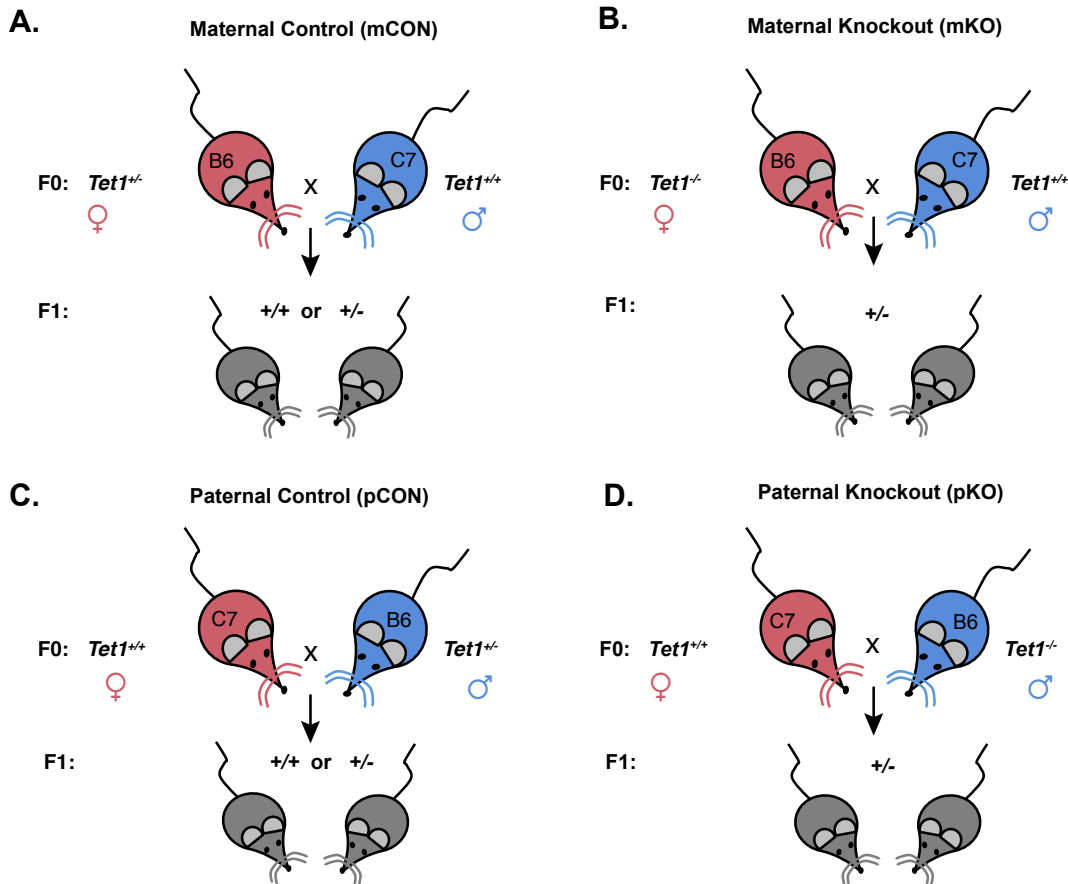

**Supplemental Figure 2. F1 hybrid breeding schemes for analyzing allele-specific expression.** (A) *Tet1*<sup>-/-</sup> female mice on the B6 background were mated to *Tet1*<sup>+/+</sup> mice on the C7 background to generate maternal control offspring (mCON) for analysis. (B) *Tet1*<sup>-/-</sup> female mice on the B6 background were mated to *Tet1*<sup>+/+</sup> mice on the C7 background to generate maternal KO offspring (mKO) for analysis. (C) *Tet1*<sup>+/+</sup> females on the C7 background were crossed to *Tet1*<sup>-/-</sup> males on the B6 background to generate paternal control offspring (pCON) for analysis. (D) *Tet1*<sup>+/+</sup> females on the C7 background were crossed to *Tet1*<sup>-/-</sup> males on the B6 background to generate paternal KO offspring (pKO) for analysis.

FIG. S3

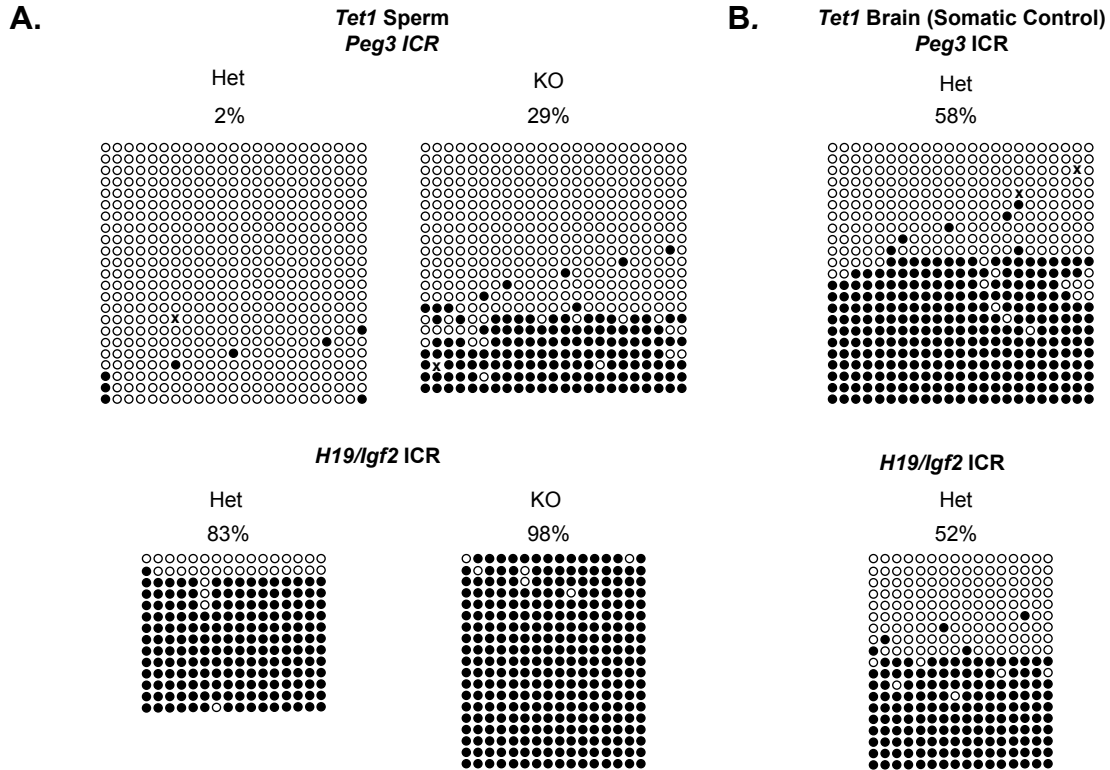

**Supplemental Figure 3. Bisulfite sequencing validation of *Tet1* sperm DNA methylation.** (A) Bisulfite sequencing of the *Peg3* ICR for both control heterozygous sperm and KO sperm. Bisulfite plots for the *H19/Igf2* ICR is shown as a control. (B) Bisulfite sequencing of a somatic control brain showing the expected methylation pattern at the *Peg3* ICR as a control. Each circle represents a CpG, white = unmethylated, black = methylated. Each row represents one cloned strand of DNA. Each bisulfite plot represents one animal and results from two technical PCR replicates.

FIG. S4

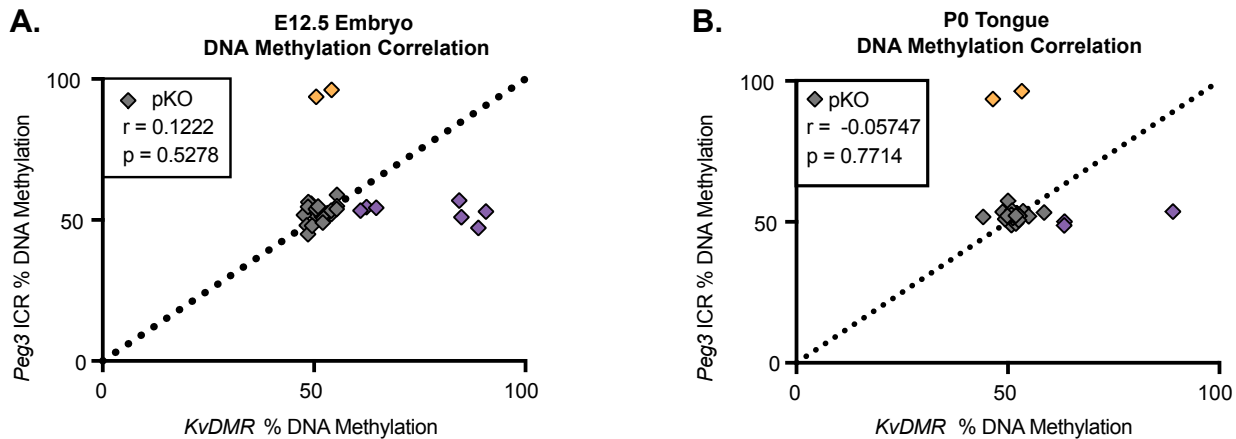

**Supplemental Figure 4. Hypermethylation at the *KvDMR* and *Peg3* ICRs is mutually exclusive in E12.5 pKO embryos and P0 newborns.** (A) Correlation plot showing DNA methylation per E12.5 pKO embryo at the *KvDMR* and *Peg3* ICRs. (B) Correlation plot showing DNA methylation per P0 pup (tongue) at the *KvDMR* and *Peg3* ICRs. Gray diamonds show unaffected pKO pups. The orange diamonds highlight pups with *Peg3* hypermethylation. The purple diamonds highlight pups with *KvDMR* hypermethylation.  $r$  = Spearman correlation coefficient. Dotted line represents hypothetical perfect correlation.

**FIG. S5**

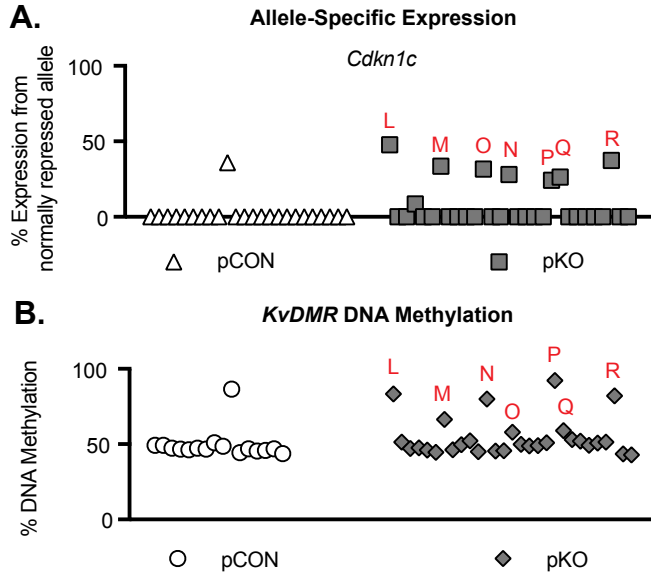

**Supplemental Figure 5. Abnormal biallelic expression and DNA hypermethylation are consistent in the E12.5 placental tissues.** (A) Allele-specific expression of *Cdkn1c* in the E12.5 placenta (corresponding to the embryos from Figure 6 in the main text). *Cdkn1c* (n) pCON = 24 placentas from 3 litters; pKO = 29 placentas from 7 litters. (B) Percent DNA methylation at the *KvDMR*. (n) pCON = 16 placentas from 2 litters; pKO = 29 placentas from 7 litters. Abnormal placentas are indicated with red letters and this lettering is consistent between all graphs in Figures 6B and 6C and supplemental Figures 5A and 5B. All placentas are in the same order from left to right in A and B.

**Table S1: % DNA methylation at ICRs in Tet1 oocytes with inclusion data.**

| Mouse # | Genotype | ICR DNA Methylation (% Average) |               |                                 |              |              |              | <i>H19/Igf2</i><br>and/or <i>IG-DMR</i> ? | Number of<br>Control ICRS | TOP 2<br>avg >90% | Both<br>Criteria<br>Met? |
|---------|----------|---------------------------------|---------------|---------------------------------|--------------|--------------|--------------|-------------------------------------------|---------------------------|-------------------|--------------------------|
|         |          | Paternally Methylated           |               | Maternally Methylated (Control) |              |              |              |                                           |                           |                   |                          |
|         |          | <i>H19</i>                      | <i>IG-DMR</i> | <i>Peg3</i>                     | <i>Snrpn</i> | <i>Peg1</i>  | <i>KvDMR</i> |                                           |                           |                   |                          |
| 5629A   | WT       | 1.4                             | 0.0           | <b>97.2</b>                     |              | <b>97.4</b>  |              | yes                                       | 2                         | 97.3              | yes                      |
| 5826    | WT       |                                 | 0.8           | <b>93.7</b>                     | <b>98.2</b>  | 75.6         |              | yes                                       | 3                         | 95.9              | yes                      |
| W956    | WT       | 4.1                             | 7.2           | 93.0                            | <b>97.9</b>  | <b>96.0</b>  |              | yes                                       | 3                         | 96.9              | yes                      |
| W1096   | WT       | 3.1                             | 15.1          | 84.9                            | <b>92.6</b>  | <b>94.5</b>  |              | yes                                       | 3                         | 93.5              | yes                      |
| W1542   | WT       | 1.0                             | 0.9           | <b>97.9</b>                     |              | <b>92.7</b>  |              | yes                                       | 2                         | 95.3              | yes                      |
| 5442    | Het      | 6.7                             | 0.5           | <b>98.7</b>                     | 81.1         | <b>95.6</b>  |              | yes                                       | 3                         | 97.1              | yes                      |
| Het442  | Het      | 2.0                             | 0.8           | <b>89.0</b>                     | <b>97.7</b>  | 81.9         | 64.9         | yes                                       | 4                         | 93.4              | yes                      |
| H1095   | Het      | 6.7                             | 0.6           | <b>86.7</b>                     | 76.7         | <b>95.7</b>  |              | yes                                       | 3                         | 91.2              | yes                      |
| H1550   | Het      | 0.7                             | 5.5           | <b>91.4</b>                     |              | <b>94.6</b>  |              | yes                                       | 2                         | 93.0              | yes                      |
| LEP     | KO       | 2.3                             |               | <b>95.0</b>                     |              | 60.8         | <b>96.8</b>  | yes                                       | 3                         | 95.9              | yes                      |
| 5619    | KO       | 1.0                             | 0.5           | <b>99.1</b>                     | <b>85.3</b>  | 83.5         |              | yes                                       | 3                         | 92.2              | yes                      |
| 5828    | KO       | 1.1                             | 64.0          | <b>95.0</b>                     | <b>98.1</b>  | 94.6         |              | yes                                       | 3                         | 96.5              | yes                      |
| 5834B   | KO       | 0.9                             | 0.5           | <b>98.0</b>                     | <b>98.0</b>  | 94.7         |              | yes                                       | 3                         | 98.0              | yes                      |
| Mut554A | KO       | 14.0                            | 11.7          | <b>89.9</b>                     | <b>97.5</b>  | 80.5         | 67.8         | yes                                       | 4                         | 97.8              | yes                      |
| Mut445  | KO       | 11.4                            | 21.3          | <b>95.0</b>                     | <b>97.8</b>  | 74.4         |              | yes                                       | 3                         | 96.4              | yes                      |
| M1097   | KO       |                                 | 0.8           | <b>96.1</b>                     | <b>98.3</b>  | 91.9         |              | yes                                       | 3                         | 97.2              | yes                      |
| M1027   | KO       | 15.9                            | 50.6          | <b>99.3</b>                     | 92.4         | <b>100.0</b> |              | yes                                       | 3                         | 99.6              | yes                      |
| M1541   | KO       | 15.8                            | 78.8          | <b>92.1</b>                     | 89.5         | <b>100.0</b> |              | yes                                       | 3                         | 96.0              | yes                      |

**Bold type indicates the top two most highly methylated maternally methylated ICRs**

Table S2: Litter (denoted with unique letters), sex (M= male, F = female), allele-specific expression, and DNA methylation data for all E10.5 mCON and mKO embryo and placentas.

| Cross | Original ID | Paper ID | Sex | Litter | Allele-Specific Expression- % Expression from normally repressed allele |              |             |               | ICR DNA Methylation - (% Average) |                   |               |                 |             |               |              |                |
|-------|-------------|----------|-----|--------|-------------------------------------------------------------------------|--------------|-------------|---------------|-----------------------------------|-------------------|---------------|-----------------|-------------|---------------|--------------|----------------|
|       |             |          |     |        | H19 Embryo                                                              | H19 Placenta | Igf2 Embryo | Igf2 Placenta | H19/Igf2 Embryo                   | H19/Igf2 Placenta | IG-DMR Embryo | IG-DMR Placenta | Peg3 Embryo | Peg3 Placenta | KvDMR Embryo | KvDMR Placenta |
| mCON  | 1           |          | F   | A      | 0.0                                                                     | 0.0          | 0.0         | 0.0           | 56.1                              | 58.2              | 44.3          | 54.3            |             |               | 52.3         | 46.8           |
| mCON  | 2           |          | M   | A      | 0.0                                                                     | 0.0          | 0.0         | 0.0           | 55.2                              | 55.1              | 42.1          | 63.0            |             |               | 52.5         | 48.1           |
| mCON  | 3           |          | F   | A      | 0.0                                                                     | 0.0          | 0.0         | 0.0           | 56.6                              | 53.7              | 46.2          | 42.3            |             |               | 53.4         | 49.4           |
| mCON  | 4           |          | F   | A      | 0.0                                                                     | 0.0          | 0.0         | 0.0           | 57.0                              | 57.6              | 41.6          | 62.7            |             |               | 51.5         | 50.3           |
| mCON  | 5           |          | M   | A      | 0.0                                                                     | 0.0          | 0.0         | 0.0           | 56.4                              | 56.8              | 46.6          | 42.7            |             |               | 49.7         | 47.6           |
| mCON  | 6           |          | M   | A      |                                                                         | 0.0          |             |               | 57.4                              |                   | 46.2          |                 |             |               | 51.0         |                |
| mCON  | 7           |          | M   | A      | 0.0                                                                     | 0.0          | 0.0         | 0.0           | 58.5                              | 55.3              | 45.3          | 51.0            |             |               | 51.9         | 47.4           |
| mCON  | 8           |          | F   | A      | 0.0                                                                     | 0.0          | 0.0         | 0.0           | 57.6                              | 58.0              | 42.2          | 53.3            |             |               | 51.9         | 48.0           |
| mCON  | 9           |          | F   | B      | 0.0                                                                     | 0.0          | 0.0         | 0.0           | 55.7                              | 60.5              | 51.3          | 60.0            |             |               | 48.8         | 52.2           |
| mCON  | 10          |          | M   | B      | 0.0                                                                     | 0.0          | 0.0         | 0.0           | 57.5                              | 57.2              | 50.7          | 69.4            |             |               | 49.2         | 54.6           |
| mCON  | 11          |          | M   | B      | 0.0                                                                     | 0.0          | 0.0         | 0.0           | 55.1                              | 55.4              | 47.6          | 60.9            |             |               | 50.5         | 56.0           |
| mCON  | 12          |          | M   | B      | 0.0                                                                     | 0.0          | 0.0         | 0.0           | 56.6                              | 60.3              | 49.7          | 43.4            |             |               | 50.1         | 55.1           |
| mCON  | 13          |          | M   | B      | 0.0                                                                     | 0.0          | 0.0         | 0.0           | 57.9                              | 62.1              | 45.3          | 59.5            |             |               | 53.8         | 53.5           |
| mCON  | 14          |          | F   | B      | 0.0                                                                     | 0.0          | 0.0         | 0.0           | 53.2                              | 57.0              | 46.4          | 48.4            |             | 51.2          | 50.6         | 53.8           |
| mCON  | 15          |          | M   | B      |                                                                         | 0.0          |             |               | 57.2                              |                   | 52.1          |                 |             |               | 49.8         |                |
| mCON  | 16          |          | M   | B      | 0.0                                                                     | 0.0          | 0.0         | 0.0           | 56.2                              | 61.6              | 48.7          | 62.5            |             | 50.0          | 52.6         | 52.4           |
| mCON  | 17          |          | M   | B      | 0.0                                                                     | 0.0          | 0.0         | 0.0           |                                   | 56.0              |               | 47.3            |             |               |              | 53.4           |
| mCON  | 24          |          | F   | C      | 0.0                                                                     | 0.0          | 0.0         | 0.0           | 55.2                              |                   | 43.5          |                 | 49.0        |               | 50.6         |                |
| mCON  | 25          |          | F   | C      | 0.0                                                                     | 0.0          | 0.0         | 0.0           | 57.2                              | 58.7              | 44.3          | 52.2            | 48.5        | 55.9          | 50.2         | 51.5           |
| mCON  | 26          |          | M   | C      | 0.0                                                                     | 0.0          | 0.0         | 0.0           | 55.3                              | 59.1              | 43.8          | 46.5            | 48.8        | 49.6          | 51.1         | 48.5           |
| mCON  | 27          |          | M   | C      | 0.0                                                                     | 0.0          | 0.0         | 0.0           | 54.7                              | 57.9              | 43.7          | 46.8            | 49.8        | 50.7          | 51.3         | 53.9           |
| mCON  | 28          |          | F   | C      | 0.0                                                                     | 0.0          | 0.0         | 0.0           | 56.2                              | 61.2              | 44.1          | 48.9            | 50.8        | 49.9          | 51.7         | 52.7           |
| mCON  | 29          |          | M   | C      | 0.0                                                                     | 0.0          | 0.0         | 0.0           | 59.0                              | 59.6              | 45.0          | 51.4            | 50.3        | 51.1          | 50.1         | 53.2           |
| mCON  | 30          |          | M   | C      | 0.0                                                                     | 0.0          | 0.0         | 0.0           | 55.4                              | 59.0              | 41.5          | 48.1            | 48.9        | 47.8          | 50.3         | 51.4           |
| mCON  | 31          |          | M   | C      | 0.0                                                                     | 0.0          | 0.0         | 0.0           | 55.8                              | 57.4              | 43.7          | 56.4            | 50.2        | 50.6          | 50.7         | 51.6           |
| mCON  | 32          |          | F   | D      | 0.0                                                                     | 0.0          | 0.0         | 0.0           | 55.3                              |                   | 47.0          |                 | 46.2        |               | 48.6         |                |
| mCON  | 33          |          | M   | D      | 0.0                                                                     | 0.0          | 0.0         | 0.0           | 54.6                              |                   | 45.7          |                 | 46.2        |               | 49.9         |                |
| mCON  | 34          |          | F   | D      | 0.0                                                                     | 0.0          | 0.0         | 0.0           | 55.3                              |                   | 45.4          |                 | 49.8        |               | 50.9         |                |
| mCON  | 35          |          | F   | D      | 0.0                                                                     | 0.0          | 0.0         | 0.0           | 53.4                              |                   | 41.7          |                 | 48.0        |               | 48.0         |                |
| mCON  | 36          |          | F   | D      | 0.0                                                                     | 0.0          | 0.0         | 0.0           | 53.2                              |                   | 46.6          |                 | 50.6        |               | 52.3         |                |
| mCON  | 37          |          | F   | D      | 0.0                                                                     | 0.0          | 0.0         | 0.0           | 58.8                              |                   | 42.4          |                 | 45.5        |               | 49.9         |                |
| mCON  | 38          |          | M   | D      | 0.0                                                                     | 0.0          | 0.0         | 0.0           | 55.1                              |                   | 46.1          |                 | 51.3        |               | 53.4         |                |
| mCON  | 39          |          | F   | D      | 0.0                                                                     | 0.0          | 0.0         | 0.0           | 51.7                              |                   | 43.9          |                 | 47.4        |               | 50.2         |                |
| mCON  | 40          |          | F   | D      | 0.0                                                                     | 0.0          | 0.0         | 0.0           | 55.0                              |                   | 95.0          |                 | 51.9        |               | 50.2         |                |
| mCON  | 49          |          | M   | E      |                                                                         |              |             |               |                                   |                   |               |                 |             |               |              |                |
| mCON  | 50          |          | F   | E      |                                                                         |              |             |               |                                   |                   |               |                 |             |               |              |                |
| mCON  | 51          |          | M   | E      |                                                                         |              |             |               |                                   |                   |               |                 |             |               |              |                |
| mCON  | 52          |          | F   | E      |                                                                         |              |             |               |                                   |                   |               |                 |             |               |              |                |
| mCON  | 53          |          | M   | E      |                                                                         |              |             |               |                                   |                   |               |                 |             |               |              |                |
| mCON  | 54          |          | M   | E      |                                                                         |              |             |               |                                   |                   |               |                 |             |               |              |                |
| mCON  | 55          |          | F   | E      |                                                                         |              |             |               |                                   |                   |               |                 |             |               |              |                |
| mCON  | 56          |          | F   | E      |                                                                         |              |             |               |                                   |                   |               |                 |             |               |              |                |
| mCON  | 57          |          | M   | E      |                                                                         |              |             |               |                                   |                   |               |                 |             |               |              |                |
| mKO   | 1           |          | M   | F      | 0.0                                                                     | 0.0          | 0.0         | 0.0           | 56.6                              | 55.6              | 45.3          | 40.9            |             |               | 52.7         | 47.9           |
| mKO   | 2           |          | M   | F      | 0.0                                                                     | 0.0          | 0.0         | 0.0           | 59.5                              | 58.0              | 46.0          | 55.5            |             |               | 50.6         | 50.1           |
| mKO   | 3           |          | F   | F      | 0.0                                                                     | 0.0          | 0.0         | 0.0           | 56.7                              | 59.4              | 43.2          | 50.1            |             |               | 50.5         | 49.7           |
| mKO   | 4           |          | M   | F      | 0.0                                                                     | 0.0          | 0.0         | 0.0           | 62.9                              | 57.9              | 41.9          | 58.9            |             |               | 53.2         | 49.8           |
| mKO   | 5           |          | F   | F      | 0.0                                                                     | 0.0          | 0.0         | 0.0           | 52.5                              | 52.5              | 49.9          | 46.4            |             |               | 51.0         | 47.2           |
| mKO   | 6           | D        | F   | F      | 0.0                                                                     | 0.0          | 0.0         | 0.0           | 58.2                              | 61.3              | 96.0          | 80.7            |             |               | 50.7         | 49.1           |
| mKO   | 8           |          | F   | F      | 0.0                                                                     | 0.0          | 0.0         | 0.0           | 59.9                              | 58.1              | 41.9          | 47.0            |             |               | 50.6         | 46.9           |
| mKO   | 9           | E        | M   | G      | 0.0                                                                     | 0.0          | 0.0         | 0.0           | 53.3                              | 57.0              | 96.7          | 86.5            |             |               | 51.2         | 56.7           |
| mKO   | 10          |          | M   | G      | 0.0                                                                     |              | 0.0         | 0.0           | 54.6                              | 50.7              | 49.4          | 69.4            |             |               | 49.4         | 51.5           |
| mKO   | 11          |          | F   | G      | 0.0                                                                     |              | 0.0         | 0.0           | 60.0                              | 62.3              | 48.7          | 47.6            |             |               | 49.9         | 48.2           |
| mKO   | 12          | A        | F   | G      | 0.0                                                                     | 0.0          | 51.5        | 52.4          | 95.5                              | 93.2              | 95.7          | 84.5            |             |               | 49.9         | 53.0           |
| mKO   | 13          | F        | F   | G      | 0.0                                                                     | 0.0          | 0.0         | 0.0           | 57.9                              | 65.1              | 95.7          | 82.2            |             |               | 51.1         | 52.1           |
| mKO   | 14          | G        | F   | G      | 0.0                                                                     | 0.0          | 0.0         | 0.0           | 57.4                              | 59.0              | 95.7          | 86.2            |             |               | 52.3         | 49.5           |
| mKO   | 15          | H        | F   | G      | 0.0                                                                     | 0.0          | 0.0         | 0.0           | 54.6                              |                   | 96.0          |                 |             |               | 49.1         |                |
| mKO   | 16          |          | F   | G      | 0.0                                                                     | 0.0          | 0.0         | 0.0           | 55.0                              | 58.3              | 51.6          | 55.9            |             |               | 50.7         | 49.9           |
| mKO   | 18          |          | F   | H      | 0.0                                                                     | 0.0          | 0.0         | 0.0           | 55.3                              | 56.1              | 41.7          | 51.4            | 50.6        | 46.9          | 53.3         | 47.6           |
| mKO   | 19          |          | M   | H      | 0.0                                                                     | 0.0          | 0.0         | 0.0           | 59.3                              | 59.7              | 43.4          | 56.2            | 50.8        | 51.4          | 53.0         | 53.2           |
| mKO   | 20          |          | M   | H      | 0.0                                                                     | 0.0          | 0.0         | 0.0           | 55.7                              | 58.4              | 45.7          | 61.9            | 50.8        | 51.6          | 52.0         | 53.2           |
| mKO   | 21          | I        | F   | H      | 0.0                                                                     | 0.0          | 0.0         | 0.0           | 55.1                              | 57.0              | 95.7          | 83.0            | 51.0        | 52.1          | 50.9         | 51.6           |
| mKO   | 22          |          | F   | H      | 0.0                                                                     | 0.0          | 0.0         | 0.0           | 60.3                              | 57.2              | 44.8          | 52.7            | 49.1        | 49.9          | 50.4         | 51.5           |
| mKO   | 23          |          | M   | I      | 0.0                                                                     | 0.0          | 0.0         | 0.0           | 55.0                              |                   | 43.4          |                 | 52.9        |               | 50.5         |                |
| mKO   | 25          |          | M   | I      | 0.0                                                                     | 0.0          | 0.0         | 0.0           | 54.5                              |                   | 45.5          |                 | 50.9        |               | 51.3         |                |
| mKO   | 26          |          | M   | J      | 0.0                                                                     | 0.0          | 0.0         | 0.0           | 54.5                              |                   | 44.9          |                 | 53.1        |               | 48.2         |                |
| mKO   | 27          | B        | F   | J      | 0.0                                                                     | 0.0          | 53.3        | 55.5          | 90.0                              |                   | 45.0          |                 | 50.0        |               | 51.3         |                |
| mKO   | 28          | J        | F   | J      | 0.0                                                                     | 0.0          | 0.0         | 0.0           | 54.0                              |                   | 95.4          |                 | 50.2        |               | 51.2         |                |
| mKO   | 29          |          | M   | J      | 0.0                                                                     | 0.0          | 0.0         | 0.0           | 55.1                              |                   | 43.5          |                 | 49.8        |               | 50.1         |                |
| mKO   | 30          |          | M   | J      | 0.0                                                                     | 0.0          | 0.0         | 0.0           | 53.2                              |                   | 44.3          |                 | 50.3        |               | 50.1         |                |
| mKO   | 31          |          | F   | J      | 0.0                                                                     | 0.0          | 0.0         | 0.0           | 54.4                              |                   | 43.8          |                 | 48.3        |               | 50.3         |                |
| mKO   | 33          |          | M   | J      | 0.0                                                                     | 0.0          | 0.0         | 0.0           | 57.4                              |                   | 41.1          |                 | 49.7        |               | 51.4         |                |
| mKO   | 34          | K        | M   | K      | 0.0                                                                     | 0.0          | 0.0         | 0.0           | 55.8                              | 49.3              | 96.4          | 87.1            | 50.3        | 36.0          | 53.5         | 47.8           |
| mKO   | 35          | L        | F   | K      | 0.0                                                                     | 0.0          | 0.0         | 0.0           | 61.9                              | 54.3              | 94.5          | 84.7            | 55.1        | 44.7          | 52.9         | 46.9           |
| mKO   | 36          |          | M   | L      | 0.0                                                                     | 0.0          | 0.0         | 0.0           | 55.2                              | 54.8              | 43.9          | 46.6            | 51.1        | 48.5          | 56.8         | 49.1           |
| mKO   | 37          |          | M   | L      | 0.0                                                                     | 0.0          | 0.0         | 0.0           | 56.4                              | 53.3              | 43.1          | 53.8            | 50.3        | 45.8          | 52.2         | 47.5           |
| mKO   | 39          | C        | M   | L      | 0.0                                                                     | 0.0          | 60.1        | 60.0          | 81.1                              | 78.5              | 42.7          | 65.6            | 51.7        | 39.6          | 53.7         | 43.5           |
| mKO   | 40          |          | F   | L      | 0.0                                                                     | 0.0          | 0.0         | 0.0           | 54.5                              | 53.1              | 46.0          | 53.0            | 52.8        | 46.4          | 49.6         | 51.5           |
| mKO   | 41          |          | M   | L      | 0.0                                                                     | 0.0          | 0.0         | 0.0           | 61.8                              | 57.0              | 43.3          | 46.1            | 51.5        | 50.6          | 50.2         | 47.9           |

**Table S3: Sex ratio information for both maternal and paternal Tet1 offspring.**

| <b>Maternal E10.5 mCON</b>                                                     |          |            |       | <b>Maternal E10.5 mKO</b>                                                                                                                                                                                                                                                                                                                                                                                                                                  |          |          |       |                           |  |  |          |            |      |   |    |        |   |    |
|--------------------------------------------------------------------------------|----------|------------|-------|------------------------------------------------------------------------------------------------------------------------------------------------------------------------------------------------------------------------------------------------------------------------------------------------------------------------------------------------------------------------------------------------------------------------------------------------------------|----------|----------|-------|---------------------------|--|--|----------|------------|------|---|----|--------|---|----|
|                                                                                | Observed | Expected   | TOTAL |                                                                                                                                                                                                                                                                                                                                                                                                                                                            | Observed | Expected | TOTAL |                           |  |  |          |            |      |   |    |        |   |    |
| Male                                                                           | 21       | 17         | 38    | Male                                                                                                                                                                                                                                                                                                                                                                                                                                                       | 18       | 18       | 36    |                           |  |  |          |            |      |   |    |        |   |    |
| Female                                                                         | 13       | 17         | 30    | Female                                                                                                                                                                                                                                                                                                                                                                                                                                                     | 18       | 18       | 36    |                           |  |  |          |            |      |   |    |        |   |    |
| TOTAL                                                                          | 34       | 34         | 68    | TOTAL                                                                                                                                                                                                                                                                                                                                                                                                                                                      | 36       | 36       | 72    |                           |  |  |          |            |      |   |    |        |   |    |
| Two-tailed Chi-Square: $p = 0.170$<br>Sex ratio is not significantly different |          |            |       | Two-tailed Chi-Square: 1.000<br>Sex ratio is not significantly different                                                                                                                                                                                                                                                                                                                                                                                   |          |          |       |                           |  |  |          |            |      |   |    |        |   |    |
|                                                                                |          |            |       | <table border="1"> <thead> <tr> <th colspan="2"><b>Maternal E10.5 mKO</b></th> </tr> <tr> <th></th> <th>Affected</th> <th>Unaffected</th> </tr> </thead> <tbody> <tr> <td>Male</td> <td>3</td> <td>16</td> </tr> <tr> <td>Female</td> <td>9</td> <td>8</td> </tr> </tbody> </table> <p>The two-tailed P value = 0.033<br/>The association between rows and columns is significant.</p>                                                                     |          |          |       | <b>Maternal E10.5 mKO</b> |  |  | Affected | Unaffected | Male | 3 | 16 | Female | 9 | 8  |
| <b>Maternal E10.5 mKO</b>                                                      |          |            |       |                                                                                                                                                                                                                                                                                                                                                                                                                                                            |          |          |       |                           |  |  |          |            |      |   |    |        |   |    |
|                                                                                | Affected | Unaffected |       |                                                                                                                                                                                                                                                                                                                                                                                                                                                            |          |          |       |                           |  |  |          |            |      |   |    |        |   |    |
| Male                                                                           | 3        | 16         |       |                                                                                                                                                                                                                                                                                                                                                                                                                                                            |          |          |       |                           |  |  |          |            |      |   |    |        |   |    |
| Female                                                                         | 9        | 8          |       |                                                                                                                                                                                                                                                                                                                                                                                                                                                            |          |          |       |                           |  |  |          |            |      |   |    |        |   |    |
| <b>Maternal P0 mCON</b>                                                        |          |            |       | <b>Maternal P0 mKO</b>                                                                                                                                                                                                                                                                                                                                                                                                                                     |          |          |       |                           |  |  |          |            |      |   |    |        |   |    |
|                                                                                | Observed | Expected   | TOTAL |                                                                                                                                                                                                                                                                                                                                                                                                                                                            | Observed | Expected | TOTAL |                           |  |  |          |            |      |   |    |        |   |    |
| Male                                                                           | 8        | 8          | 16    | Male                                                                                                                                                                                                                                                                                                                                                                                                                                                       | 14       | 15       | 29    |                           |  |  |          |            |      |   |    |        |   |    |
| Female                                                                         | 8        | 8          | 16    | Female                                                                                                                                                                                                                                                                                                                                                                                                                                                     | 16       | 15       | 31    |                           |  |  |          |            |      |   |    |        |   |    |
| TOTAL                                                                          | 16       | 16         | 32    | TOTAL                                                                                                                                                                                                                                                                                                                                                                                                                                                      | 30       | 30       | 60    |                           |  |  |          |            |      |   |    |        |   |    |
| Two-tailed Chi-Square: $p = 1.000$<br>Sex ratio is not significantly different |          |            |       | Two-tailed Chi-Square: $p = 0.715$<br>Sex ratio is not significantly different                                                                                                                                                                                                                                                                                                                                                                             |          |          |       |                           |  |  |          |            |      |   |    |        |   |    |
|                                                                                |          |            |       | <table border="1"> <thead> <tr> <th colspan="2"><b>Maternal P0 mKO</b></th> </tr> <tr> <th></th> <th>Affected</th> <th>Unaffected</th> </tr> </thead> <tbody> <tr> <td>Male</td> <td>0</td> <td>16</td> </tr> <tr> <td>Female</td> <td>3</td> <td>13</td> </tr> </tbody> </table> <p>Affected = J, K, and # (see Table S6)<br/>Two-tailed Fisher's Exact Test: <math>p = 0.226</math><br/>The association between rows and columns is not significant.</p> |          |          |       | <b>Maternal P0 mKO</b>    |  |  | Affected | Unaffected | Male | 0 | 16 | Female | 3 | 13 |
| <b>Maternal P0 mKO</b>                                                         |          |            |       |                                                                                                                                                                                                                                                                                                                                                                                                                                                            |          |          |       |                           |  |  |          |            |      |   |    |        |   |    |
|                                                                                | Affected | Unaffected |       |                                                                                                                                                                                                                                                                                                                                                                                                                                                            |          |          |       |                           |  |  |          |            |      |   |    |        |   |    |
| Male                                                                           | 0        | 16         |       |                                                                                                                                                                                                                                                                                                                                                                                                                                                            |          |          |       |                           |  |  |          |            |      |   |    |        |   |    |
| Female                                                                         | 3        | 13         |       |                                                                                                                                                                                                                                                                                                                                                                                                                                                            |          |          |       |                           |  |  |          |            |      |   |    |        |   |    |
| <b>Paternal E12.5 pCON</b>                                                     |          |            |       | <b>Paternal E12.5 pKO</b>                                                                                                                                                                                                                                                                                                                                                                                                                                  |          |          |       |                           |  |  |          |            |      |   |    |        |   |    |
|                                                                                | Observed | Expected   | TOTAL |                                                                                                                                                                                                                                                                                                                                                                                                                                                            | Observed | Expected | TOTAL |                           |  |  |          |            |      |   |    |        |   |    |
| Male                                                                           | 11       | 11.5       | 22.5  | Male                                                                                                                                                                                                                                                                                                                                                                                                                                                       | 10       | 14.5     | 24.5  |                           |  |  |          |            |      |   |    |        |   |    |
| Female                                                                         | 12       | 11.5       | 23.5  | Female                                                                                                                                                                                                                                                                                                                                                                                                                                                     | 19       | 14.5     | 33.5  |                           |  |  |          |            |      |   |    |        |   |    |
| TOTAL                                                                          | 23       | 23         | 46    | TOTAL                                                                                                                                                                                                                                                                                                                                                                                                                                                      | 29       | 29       | 58    |                           |  |  |          |            |      |   |    |        |   |    |
| Two-tailed Chi-Square: $p = 0.835$<br>Sex ratio is not significantly different |          |            |       | Two-tailed Chi-Square: $p = 0.095$<br>Sex ratio is not significantly different                                                                                                                                                                                                                                                                                                                                                                             |          |          |       |                           |  |  |          |            |      |   |    |        |   |    |
|                                                                                |          |            |       | <table border="1"> <thead> <tr> <th colspan="2"><b>Paternal E12.5 pKO</b></th> </tr> <tr> <th></th> <th>Affected</th> <th>Unaffected</th> </tr> </thead> <tbody> <tr> <td>Male</td> <td>3</td> <td>7</td> </tr> <tr> <td>Female</td> <td>4</td> <td>15</td> </tr> </tbody> </table> <p>Two-tailed Fisher's Exact Test: <math>p = 0.665</math><br/>The association between rows and columns is not significant.</p>                                         |          |          |       | <b>Paternal E12.5 pKO</b> |  |  | Affected | Unaffected | Male | 3 | 7  | Female | 4 | 15 |
| <b>Paternal E12.5 pKO</b>                                                      |          |            |       |                                                                                                                                                                                                                                                                                                                                                                                                                                                            |          |          |       |                           |  |  |          |            |      |   |    |        |   |    |
|                                                                                | Affected | Unaffected |       |                                                                                                                                                                                                                                                                                                                                                                                                                                                            |          |          |       |                           |  |  |          |            |      |   |    |        |   |    |
| Male                                                                           | 3        | 7          |       |                                                                                                                                                                                                                                                                                                                                                                                                                                                            |          |          |       |                           |  |  |          |            |      |   |    |        |   |    |
| Female                                                                         | 4        | 15         |       |                                                                                                                                                                                                                                                                                                                                                                                                                                                            |          |          |       |                           |  |  |          |            |      |   |    |        |   |    |
| <b>Paternal P0 pCON</b>                                                        |          |            |       | <b>Paternal P0 pKO</b>                                                                                                                                                                                                                                                                                                                                                                                                                                     |          |          |       |                           |  |  |          |            |      |   |    |        |   |    |
|                                                                                | Observed | Expected   | TOTAL |                                                                                                                                                                                                                                                                                                                                                                                                                                                            | Observed | Expected | TOTAL |                           |  |  |          |            |      |   |    |        |   |    |
| Male                                                                           | 13       | 11.5       | 24.5  | Male                                                                                                                                                                                                                                                                                                                                                                                                                                                       | 17       | 14       | 31    |                           |  |  |          |            |      |   |    |        |   |    |
| Female                                                                         | 10       | 11.5       | 21.5  | Female                                                                                                                                                                                                                                                                                                                                                                                                                                                     | 11       | 14       | 25    |                           |  |  |          |            |      |   |    |        |   |    |
| TOTAL                                                                          | 23       | 23         | 46    | TOTAL                                                                                                                                                                                                                                                                                                                                                                                                                                                      | 28       | 28       | 56    |                           |  |  |          |            |      |   |    |        |   |    |
| Two-tailed Chi-Square: $p = 0.532$<br>Sex ratio is not significantly different |          |            |       | Two-tailed Chi-Square: $p = 0.257$<br>Sex ratio is not significantly different                                                                                                                                                                                                                                                                                                                                                                             |          |          |       |                           |  |  |          |            |      |   |    |        |   |    |
|                                                                                |          |            |       | <table border="1"> <thead> <tr> <th colspan="2"><b>Paternal P0 pKO</b></th> </tr> <tr> <th></th> <th>Affected</th> <th>Unaffected</th> </tr> </thead> <tbody> <tr> <td>Male</td> <td>0</td> <td>17</td> </tr> <tr> <td>Female</td> <td>3</td> <td>8</td> </tr> </tbody> </table> <p>Two-tailed Fisher's Exact Test: <math>p = 0.050</math><br/>The association between rows and columns is not significant.</p>                                            |          |          |       | <b>Paternal P0 pKO</b>    |  |  | Affected | Unaffected | Male | 0 | 17 | Female | 3 | 8  |
| <b>Paternal P0 pKO</b>                                                         |          |            |       |                                                                                                                                                                                                                                                                                                                                                                                                                                                            |          |          |       |                           |  |  |          |            |      |   |    |        |   |    |
|                                                                                | Affected | Unaffected |       |                                                                                                                                                                                                                                                                                                                                                                                                                                                            |          |          |       |                           |  |  |          |            |      |   |    |        |   |    |
| Male                                                                           | 0        | 17         |       |                                                                                                                                                                                                                                                                                                                                                                                                                                                            |          |          |       |                           |  |  |          |            |      |   |    |        |   |    |
| Female                                                                         | 3        | 8          |       |                                                                                                                                                                                                                                                                                                                                                                                                                                                            |          |          |       |                           |  |  |          |            |      |   |    |        |   |    |



Table S4: Litter (denoted with unique letters), sex (M= male, F = female), allele-specific expression, and DNA methylation data for all P0 mCON and mKO brain, liver, and tongue.

| Cross | Original ID | Paper ID                  | Sex | Litter | Allele-Specific Expression- % Expression from normally repressed allele |       |        |       |       |        | ICR DNA Methylation- (% Average) |       |        |        |       |        |       |       |        |       |       |        |
|-------|-------------|---------------------------|-----|--------|-------------------------------------------------------------------------|-------|--------|-------|-------|--------|----------------------------------|-------|--------|--------|-------|--------|-------|-------|--------|-------|-------|--------|
|       |             |                           |     |        | H19                                                                     |       |        | Igf2  |       |        | H19/Igf2                         |       |        | IG-DMR |       |        | Peg3  |       |        | KvDMR |       |        |
|       |             |                           |     |        | Brain                                                                   | Liver | Tongue | Brain | Liver | Tongue | Brain                            | Liver | Tongue | Brain  | Liver | Tongue | Brain | Liver | Tongue | Brain | Liver | Tongue |
| mCON  | 5313-1      |                           | F   | A      | 0.0                                                                     | 0.0   | 0.0    | 0.0   | 0.0   | 63.3   |                                  |       | 51.9   |        |       | 53.1   |       |       | 57.1   |       |       |        |
| mCON  | 5313-2      |                           | M   | A      | 0.0                                                                     | 0.0   | 0.0    | 0.0   | 0.0   | 57.1   |                                  |       | 49.9   |        |       | 50.8   |       |       | 51.8   |       |       |        |
| mCON  | 5313-3      |                           | M   | A      | 0.0                                                                     | 0.0   | 0.0    | 0.0   | 0.0   | 58.9   |                                  |       | 48.3   |        |       | 52.8   |       |       | 52.2   |       |       |        |
| mCON  | 5313-4      |                           | F   | A      | 0.0                                                                     | 0.0   | 0.0    | 0.0   | 0.0   | 57.5   |                                  |       | 45.8   |        |       | 51.2   |       |       | 52.1   |       |       |        |
| mCON  | 5313-5      |                           | M   | A      | 0.0                                                                     | 0.0   | 0.0    | 0.0   | 0.0   | 57.7   |                                  |       | 45.6   |        |       | 51.5   |       |       | 51.1   |       |       |        |
| mCON  | 5313-6      |                           | F   | A      | 0.0                                                                     | 0.0   | 0.0    | 0.0   | 0.0   | 55.4   |                                  |       | 48.4   |        |       | 51.5   |       |       | 51.8   |       |       |        |
| mCON  | 5314-1      |                           | F   | B      | 0.0                                                                     | 0.0   | 0.0    | 0.0   | 0.0   | 57.6   |                                  |       | 49.5   |        |       | 51.5   |       |       | 51.4   |       |       |        |
| mCON  | 5314-2      |                           | M   | B      | 0.0                                                                     | 0.0   | 0.0    | 0.0   | 0.0   | 58.4   |                                  |       | 49.8   |        |       | 53.0   |       |       | 52.0   |       |       |        |
| mCON  | 5314-3      |                           | M   | B      | 0.0                                                                     | 0.0   | 0.0    | 0.0   | 0.0   | 61.6   |                                  |       | 48.6   |        |       | 52.4   |       |       | 52.7   |       |       |        |
| mCON  | 1330-1      |                           | F   | C      | 0.0                                                                     | 0.0   | 0.0    | 0.0   | 0.0   | 59.8   |                                  |       | 48.1   |        |       | 51.6   |       |       | 54.6   |       |       |        |
| mCON  | 1330-2      |                           | F   | C      | 0.0                                                                     | 0.0   | 0.0    | 0.0   | 0.0   | 57.0   |                                  |       | 46.6   |        |       |        |       |       | 55.1   |       |       |        |
| mCON  | 1330-3      |                           | F   | C      | 0.0                                                                     | 0.0   | 0.0    | 0.0   | 0.0   | 55.9   |                                  |       | 44.2   |        |       | 54.0   |       |       | 49.7   |       |       |        |
| mCON  | 1330-4      |                           | M   | C      | 0.0                                                                     | 0.0   | 0.0    | 0.0   | 0.0   | 59.4   |                                  |       | 46.2   |        |       | 51.9   |       |       | 50.7   |       |       |        |
| mCON  | 1330-5      |                           | M   | C      | 0.0                                                                     | 0.0   | 0.0    | 0.0   | 0.0   | 55.6   |                                  |       | 48.1   |        |       | 52.6   |       |       | 51.0   |       |       |        |
| mCON  | 1330-6      |                           | F   | C      | 0.0                                                                     | 0.0   | 0.0    | 0.0   | 0.0   | 55.6   |                                  |       | 47.4   |        |       | 51.0   |       |       | 53.3   |       |       |        |
| mCON  | 1330-7      |                           | M   | C      | 0.0                                                                     | 0.0   | 0.0    | 0.0   | 0.0   | 57.7   |                                  |       | 45.9   |        |       | 52.7   |       |       | 53.0   |       |       |        |
| mKO   | 5106-1      |                           | M   | D      | 0.0                                                                     | 0.0   | 0.0    | 0.0   | 0.0   | 58.3   |                                  |       | 48.9   |        |       | 53.2   |       |       | 52.7   |       |       |        |
| mKO   | 5106-2      |                           | F   | D      | 0.0                                                                     | 0.0   | 0.0    | 0.0   | 0.0   | 57.5   |                                  |       | 52.6   |        |       | 53.4   |       |       | 52.6   |       |       |        |
| mKO   | 5106-3      |                           | M   | D      | 0.0                                                                     | 0.0   | 0.0    | 0.0   | 0.0   | 58.6   |                                  |       | 48.3   |        |       | 50.7   |       |       | 52.7   |       |       |        |
| mKO   | 5106-4      |                           | F   | D      | 0.0                                                                     | 0.0   | 0.0    | 0.0   | 0.0   | 58.4   |                                  |       | 46.8   |        |       | 50.3   |       |       | 51.3   |       |       |        |
| mKO   | 5106-5      |                           | M   | D      | 0.0                                                                     | 0.0   | 0.0    | 0.0   | 0.0   | 50.6   |                                  |       | 49.3   |        |       | 50.0   |       |       | 53.4   |       |       |        |
| mKO   | 5106-6      |                           | F   | D      | 0.0                                                                     | 0.0   | 0.0    | 0.0   | 0.0   | 60.0   |                                  |       | 51.9   |        |       | 52.6   |       |       | 51.6   |       |       |        |
| mKO   | 5108-1      |                           | F   | E      | 0.0                                                                     | 0.0   | 0.0    | 0.0   | 0.0   | 55.1   |                                  |       | 46.4   |        |       | 51.5   |       |       | 51.2   |       |       |        |
| mKO   | 5108-2      |                           | M   | E      | 0.0                                                                     | 0.0   | 0.0    | 0.0   | 0.0   | 55.7   |                                  |       | 45.1   |        |       | 51.1   |       |       | 50.6   |       |       |        |
| mKO   | 5108-3      |                           | M   | E      | 0.0                                                                     | 0.0   | 0.0    | 0.0   | 0.0   | 58.4   |                                  |       | 46.1   |        |       | 53.2   |       |       | 49.8   |       |       |        |
| mKO   | 5108-4      |                           | F   | E      | 0.0                                                                     | 0.0   | 0.0    | 0.0   | 0.0   | 58.7   |                                  |       | 45.4   |        |       | 52.9   |       |       | 53.7   |       |       |        |
| mKO   | 5108-5      | J                         | F   | E      | 0.0                                                                     | 0.0   | 39.4   | 52.1  | 86.0  |        |                                  | 43.5  |        |        | 52.1  |        |       | 48.7  |        |       |       |        |
| mKO   | 5108-6      |                           | F   | E      | 0.0                                                                     | 0.0   | 0.0    | 0.0   | 0.0   | 55.7   |                                  |       | 47.2   |        |       | 52.9   |       |       | 52.3   |       |       |        |
| mKO   | 5106-7      |                           | F   | F      | 0.0                                                                     | 0.0   | 0.0    | 0.0   | 0.0   | 62.6   |                                  |       | 48.0   |        |       | 43.8   |       |       | 52.4   |       |       |        |
| mKO   | 5106-8      |                           | M   | F      | 0.0                                                                     | 0.0   | 0.0    | 0.0   | 0.0   | 53.5   |                                  |       | 44.0   |        |       | 53.2   |       |       | 51.3   |       |       |        |
| mKO   | 5106-9      |                           | M   | F      | 0.0                                                                     | 0.0   | 0.0    | 0.0   | 0.0   | 58.8   |                                  |       | 45.3   |        |       | 56.1   |       |       | 53.2   |       |       |        |
| mKO   | 5106-10     |                           | F   | F      | 0.0                                                                     | 0.0   | 0.0    | 0.0   | 0.0   | 49.1   |                                  |       | 42.0   |        |       | 40.6   |       |       | 64.6   |       |       |        |
| mKO   | 5106-11     |                           | M   | F      | 0.0                                                                     | 0.0   | 0.0    | 0.0   | 0.0   | 57.5   |                                  |       | 41.6   |        |       | 51.0   |       |       | 52.1   |       |       |        |
| mKO   | 5106-12     |                           | F   | F      | 0.0                                                                     | 0.0   | 0.0    | 0.0   | 0.0   | 56.4   |                                  |       | 47.3   |        |       | 52.5   |       |       | 51.5   |       |       |        |
| mKO   | 5106-13     |                           | M   | F      | 0.0                                                                     | 0.0   | 0.0    | 0.0   | 0.0   | 62.7   |                                  |       | 47.1   |        |       | 53.3   |       |       | 47.6   |       |       |        |
| mKO   | mKO-8       |                           | F   | G      | 0.0                                                                     | 0.0   | 0.0    | 0.0   | 0.0   | 60.4   |                                  |       | 46.6   |        |       | 51.9   |       |       | 51.2   |       |       |        |
| mKO   | mKO-9       |                           | F   | G      | 0.0                                                                     | 0.0   | 0.0    | 0.0   | 0.0   | 57.0   |                                  |       | 51.1   |        |       | 51.8   |       |       | 51.3   |       |       |        |
| mKO   | mKO-10      |                           | F   | G      | 0.0                                                                     | 0.0   | 0.0    | 0.0   | 0.0   | 57.1   |                                  |       | 49.4   |        |       | 52.4   |       |       | 54.6   |       |       |        |
| mKO   | 912-1       | # (See IG-DMR & Table S5) | F   | H      | 0.0                                                                     |       | 0.0    |       |       | 57.6   |                                  |       | 94.2   |        |       | 52.6   |       |       | 54.1   |       |       |        |
| mKO   | 912-2       |                           | F   | H      | 0.0                                                                     | 0.0   | 0.0    | 0.0   | 0.0   | 57.2   |                                  |       | 50.4   |        |       | 52.0   |       |       | 52.8   |       |       |        |
| mKO   | 912-3       |                           | M   | H      | 0.0                                                                     | 0.0   | 0.0    | 0.0   | 0.0   | 58.9   |                                  |       | 50.4   |        |       | 50.8   |       |       | 55.3   |       |       |        |
| mKO   | 912-4       |                           | M   | H      | 0.0                                                                     | 0.0   | 0.0    | 0.0   | 0.0   | 59.1   |                                  |       | 53.2   |        |       | 51.7   |       |       | 56.1   |       |       |        |
| mKO   | 912-5       |                           | F   | H      | 0.0                                                                     | 0.0   | 0.0    | 0.0   | 0.0   | 59.1   |                                  |       | 49.4   |        |       | 51.7   |       |       | 52.3   |       |       |        |
| mKO   | 912-6       |                           | M   | I      | 0.0                                                                     | 0.0   | 0.0    | 0.0   | 0.0   | 57.8   |                                  |       | 49.0   |        |       | 50.5   |       |       | 52.1   |       |       |        |
| mKO   | 912-7       |                           | M   | I      | 0.0                                                                     | 0.0   | 0.0    | 0.0   | 0.0   | 57.2   |                                  |       | 48.8   |        |       | 51.5   |       |       | 51.8   |       |       |        |
| mKO   | 976-2       | K                         | F   | J      | 0.0                                                                     | 0.0   | 6.7    | 11.7  | 60.2  |        |                                  | 50.2  |        |        | 50.8  |        |       | 52.5  |        |       |       |        |
| mKO   | 976-3       |                           | M   | J      | 0.0                                                                     | 0.0   | 0.0    | 0.0   | 58.9  |        |                                  | 52.4  |        |        | 51.7  |        |       | 53.7  |        |       |       |        |

Table S5: % DNA methylation at ICRs in Tet1 Sperm

| Sample ID                                | Genotype | ICR DNA Methylation (% Average) |               |                       |             |             |              |
|------------------------------------------|----------|---------------------------------|---------------|-----------------------|-------------|-------------|--------------|
|                                          |          | Paternally Methylated           |               | Maternally Methylated |             |             |              |
|                                          |          | <i>H19/Igf2</i>                 | <i>IG-DMR</i> | <i>KvDMR</i>          | <i>Peg3</i> | <i>Peg1</i> | <i>Snrpn</i> |
| W5062                                    | WT       | 94.6                            |               | 8.5                   | 7.3         |             | 5.1          |
| W5068                                    | WT       | 95.7                            |               | 2.5                   | 1.6         |             | 2.3          |
| WT1                                      | WT       | 96.0                            | 95.0          | 11.0                  | 8.0         | 5.0         | 7.0          |
| WT2                                      | WT       | 96.0                            | 95.0          | 12.0                  | 4.0         | 5.0         | 3.0          |
| WT3                                      | WT       | 94.0                            | 92.0          | 7.0                   | 5.0         | 8.0         | 6.0          |
| WT5183                                   | WT       | 97.6                            | 97.6          | 3.8                   | 3.3         | 4.8         | 3.2          |
| H4852                                    | Het      | 95.4                            | 96.9          | 4.0                   | 3.4         | 5.8         | 4.2          |
| H5059                                    | Het      | 93.7                            | 97.4          | 4.4                   | 2.9         | 5.4         | 4.5          |
| H5069                                    | Het      | 97.7                            |               | 9.6                   | 5.3         |             | 13.8         |
| H5103                                    | Het      | 95.9                            | 95.4          | 4.5                   | 3.6         | 6.4         | 6.8          |
| H5104                                    | Het      | 94.0                            | 97.3          | 4.8                   | 6.0         | 6.9         | 4.6          |
| H5105                                    | Het      | 95.0                            | 96.3          | 3.8                   | 3.3         | 5.5         | 5.9          |
| H5184                                    | Het      | 94.1                            | 97.0          | 4.4                   | 6.0         | 6.1         | 2.3          |
| Hep3                                     | Het      | 93.9                            |               | 6.7                   | 5.0         |             | 5.3          |
| Het5787                                  | Het      | 97.4                            | 96.9          | 5.3                   | 5.3         | 8.2         | 5.0          |
| Het5791                                  | Het      | 97.1                            | 97.2          | 4.4                   | 3.4         | 6.6         | 3.9          |
| M4848                                    | KO       | 95.2                            |               | 29.8                  | 3.0         |             | 5.6          |
| M4851                                    | KO       | 93.7                            |               | 33.6                  |             |             | 18.5         |
| M4859                                    | KO       | 95.0                            |               | 30.9                  | 4.6         |             | 14.2         |
| M5060                                    | KO       | 94.8                            | 95.1          | 33.9                  | 10.6        | 20.4        | 5.1          |
| M5064                                    | KO       | 96.8                            | 95.9          | 32.7                  | 10.3        | 21.5        | 5.9          |
| M5109                                    | KO       | 91.6                            |               | 39.0                  | 9.8         |             | 28.8         |
| M5311                                    | KO       | 92.6                            | 96.1          | 33.8                  | 10.8        | 18.9        | 6.1          |
| Mutep3                                   | KO       | 93.0                            | 96.4          | 34.3                  | 11.6        | 23.5        | 7.0          |
| Mutep4                                   | KO       | 96.9                            | 95.6          | 31.3                  | 10.7        | 21.2        | 3.1          |
| Mut5339                                  | KO       | 91.7                            | 88.4          | 36.5                  | 19.9        | 26.0        | 10.1         |
| Mut5781                                  | KO       | 96.8                            | 96.2          | 34.4                  | 11.7        | 19.8        | 5.4          |
| Mut5318                                  | KO       | 95.2                            | 89.4          | 37.9                  | 11.9        | 21.4        | 5.5          |
| Mut5333                                  | KO       | 96.2                            | 95.5          | 34.2                  | 10.4        | 18.4        | 5.2          |
| Mut5058                                  | KO       | 96.5                            | 95.1          | 35.8                  | 11.2        | 21.4        | 5.2          |
| Mut5728                                  | KO       | 96.8                            | 97.2          | 35.5                  | 9.8         | 17.3        | 3.1          |
| DKO 1                                    | DKO      | 94.0                            | 93.0          | 23.0                  | 6.0         | 10.0        | 7.0          |
| DKO 2                                    | DKO      | 96.0                            | 96.0          | 30.0                  | 5.0         | 20.0        | 8.0          |
| DKO 3                                    | DKO      | 96.0                            | 93.0          | 37.0                  | 9.0         | 22.0        | 11.0         |
|                                          |          | <i>H19/Igf2</i>                 | <i>IG-DMR</i> | <i>KvDMR</i>          | <i>Peg3</i> | <i>Peg1</i> | <i>Snrpn</i> |
| <b>KO vs DKO, Mann-Whitney (p-value)</b> |          | 0.985                           | 0.440         | 0.360                 | 0.065       | 0.660       | 0.203        |

**Table S6: Litter (denoted with unique letters), sex (M= male, F = female), allele-specific expression, and DNA methylation data for all E12.5 pCON and pKO embryo and placentas.**

| Cross | Original ID | Paper ID | Sex | Litter | Allele-Specific Expression- % Expression from normally repressed allele |                        |                        |                          |                   |                     |                    |                      |                    |                      | ICR DNA Methylation - (% Average) |                          |                      |                        |                    |                      |                     |                       |                    |                      |                     |                       |
|-------|-------------|----------|-----|--------|-------------------------------------------------------------------------|------------------------|------------------------|--------------------------|-------------------|---------------------|--------------------|----------------------|--------------------|----------------------|-----------------------------------|--------------------------|----------------------|------------------------|--------------------|----------------------|---------------------|-----------------------|--------------------|----------------------|---------------------|-----------------------|
|       |             |          |     |        | <i>Cdkn1c</i> Embryo                                                    | <i>Cdkn1c</i> Placenta | <i>Kcnq1ot1</i> Embryo | <i>Kcnq1ot1</i> Placenta | <i>H19</i> Embryo | <i>H19</i> Placenta | <i>Igf2</i> Embryo | <i>Igf2</i> Placenta | <i>Peg3</i> Embryo | <i>Peg3</i> Placenta | <i>H19/Igf2</i> Embryo            | <i>H19/Igf2</i> Placenta | <i>IG-DMR</i> Embryo | <i>IG-DMR</i> Placenta | <i>Peg3</i> Embryo | <i>Peg3</i> Placenta | <i>KvDMR</i> Embryo | <i>KvDMR</i> Placenta | <i>Peg1</i> Embryo | <i>Peg1</i> Placenta | <i>Snrpn</i> Embryo | <i>Snrpn</i> Placenta |
| pCON  | CE2         |          | F   | A      | 0.0                                                                     | 0.0                    | 0.0                    | 0.0                      | 0.0               | 0.0                 | 0.0                | 0.0                  |                    |                      | 50.6                              | 45.4                     | 41.6                 | 42.8                   | 47.7               | 45.1                 | 51.3                | 49.2                  | 49.3               | 41.0                 | 44.1                | 39.1                  |
| pCON  | CE3         |          | F   | A      | 0.0                                                                     | 0.0                    | 0.0                    | 0.0                      | 0.0               | 0.0                 | 0.0                | 0.0                  | 0.0                | 0.0                  | 49.2                              | 49.4                     | 38.7                 | 39.0                   | 47.8               | 46.2                 | 52.8                | 49.3                  | 49.8               | 41.2                 | 43.9                | 38.8                  |
| pCON  | CE4         |          | F   | A      | 0.0                                                                     | 0.0                    | 0.0                    | 0.0                      | 0.0               | 0.0                 | 0.0                | 0.0                  | 0.0                | 0.0                  | 51.4                              | 48.8                     | 40.7                 | 39.3                   | 48.9               | 46.5                 | 52.0                | 47.4                  | 50.2               | 42.8                 | 43.4                | 39.9                  |
| pCON  | CE5         |          | F   | A      | 0.0                                                                     | 0.0                    | 0.0                    | 0.0                      | 0.0               | 0.0                 | 0.0                | 0.0                  |                    |                      | 50.9                              | 50.4                     | 38.9                 | 36.5                   | 48.9               | 45.1                 | 52.3                | 46.7                  | 49.7               | 42.2                 | 42.5                | 41.6                  |
| pCON  | CE6         |          | M   | A      | 0.0                                                                     | 0.0                    | 0.0                    | 0.0                      | 0.0               | 0.0                 | 0.0                | 0.0                  |                    |                      | 53.3                              | 48.1                     | 42.4                 | 39.6                   | 46.7               | 46.7                 | 50.3                | 46.2                  | 50.5               | 42.1                 | 43.0                | 39.5                  |
| pCON  | CE7         |          | M   | A      | 0.0                                                                     | 0.0                    | 0.0                    | 0.0                      | 0.0               | 0.0                 | 0.0                | 0.0                  |                    |                      | 50.1                              | 52.4                     | 42.0                 | 41.4                   | 51.0               | 46.9                 | 52.1                | 47.3                  | 50.9               | 44.2                 | 44.7                | 39.5                  |
| pCON  | CE8         |          | F   | A      | 0.0                                                                     | 0.0                    | 0.0                    | 0.0                      | 0.0               | 0.0                 | 0.0                | 0.0                  |                    |                      | 48.6                              | 51.4                     | 42.5                 | 40.0                   | 48.5               | 47.3                 | 49.5                | 46.6                  | 49.0               | 42.3                 | 44.9                | 41.5                  |
| pCON  | CE18        |          | M   | B      | 0.0                                                                     | 0.0                    |                        |                          | 0.0               | 0.0                 | 0.0                | 0.0                  |                    |                      | 50.8                              | 50.9                     | 44.0                 | 54.2                   | 47.5               | 49.5                 | 51.4                | 51.0                  | 49.4               | 47.6                 | 43.9                | 42.6                  |
| pCON  | CE19        |          | M   | B      | 0.0                                                                     | 0.0                    |                        |                          | 0.0               | 0.0                 | 0.0                | 0.0                  | 0.0                | 0.0                  | 49.9                              | 46.9                     | 47.7                 | 48.1                   | 52.5               | 49.1                 | 52.6                | 48.7                  | 51.6               | 42.7                 | 45.8                | 42.0                  |
| pCON  | CE20        |          | M   | B      | 37.7                                                                    | 35.9                   | 0.0                    | 0.0                      | 0.0               | 0.0                 | 0.0                | 0.0                  | 0.0                | 0.0                  | 48.5                              | 59.3                     | 47.4                 | 52.7                   | 50.4               | 53.4                 | 92.2                | 86.5                  | 50.4               | 45.3                 | 37.2                | 41.3                  |
| pCON  | CE21        |          | M   | B      | 0.0                                                                     | 0.0                    | 0.0                    | 0.0                      | 0.0               | 0.0                 | 0.0                | 0.0                  |                    |                      | 52.2                              | 52.7                     | 54.7                 | 52.0                   | 52.7               | 48.2                 | 49.4                | 44.5                  | 49.8               | 46.5                 | 45.9                | 40.9                  |
| pCON  | CE22        |          |     | B      |                                                                         | 0.0                    |                        |                          |                   | 5.1                 |                    | 0.0                  | 0.0                |                      |                                   | 51.6                     |                      | 46.8                   |                    | 48.4                 |                     |                       | 42.7               |                      | 39.5                |                       |
| pCON  | CE23        |          | M   | B      | 0.0                                                                     | 0.0                    | 0.0                    | 0.0                      | 0.0               | 0.0                 | 0.0                | 0.0                  | 0.0                | 0.0                  | 52.7                              | 54.0                     | 50.5                 | 53.2                   | 51.3               | 49.4                 | 48.0                | 45.5                  | 51.4               | 45.0                 | 44.9                | 41.7                  |
| pCON  | CE24        |          | F   | B      | 0.0                                                                     | 0.0                    | 0.0                    | 0.0                      | 0.0               | 0.0                 | 0.0                | 0.0                  |                    |                      | 54.5                              | 53.2                     |                      | 49.3                   | 50.4               | 45.9                 | 49.3                | 45.9                  | 50.7               | 43.6                 | 48.6                | 40.2                  |
| pCON  | CE25        |          | M   | B      | 0.0                                                                     | 0.0                    | 0.0                    | 0.0                      |                   |                     |                    |                      | 0.0                | 0.0                  | 52.1                              | 51.5                     | 47.1                 | 46.7                   | 50.7               | 48.4                 | 47.1                | 46.8                  | 49.8               | 39.1                 | 42.9                | 39.2                  |
| pCON  | CE26        |          | F   | B      | 0.0                                                                     | 0.0                    | 0.0                    | 0.0                      |                   |                     |                    |                      |                    |                      | 53.4                              | 47.2                     | 43.1                 | 51.7                   | 50.5               | 45.3                 | 46.6                | 43.9                  | 49.8               | 42.6                 | 48.0                | 40.8                  |
| pCON  | CE27        |          | M   | C      | 0.0                                                                     | 0.0                    |                        |                          |                   |                     |                    |                      |                    |                      | 55.4                              |                          | 53.6                 |                        | 54.5               |                      | 55.4                |                       |                    |                      |                     | 49.5                  |
| pCON  | CE28        |          | F   | C      | 0.0                                                                     | 0.0                    |                        |                          |                   |                     |                    |                      |                    |                      | 56.0                              |                          | 50.7                 |                        | 54.2               |                      | 53.7                |                       |                    |                      |                     | 48.5                  |
| pCON  | CE29        |          | F   | C      | 0.0                                                                     | 0.0                    |                        |                          |                   |                     |                    |                      |                    |                      | 55.1                              |                          | 49.4                 |                        | 53.4               |                      | 54.8                |                       |                    |                      |                     | 49.5                  |
| pCON  | CE30        |          | F   | C      | 0.0                                                                     | 0.0                    |                        |                          |                   |                     |                    |                      |                    |                      | 55.1                              |                          |                      |                        | 52.2               |                      | 54.4                |                       |                    |                      |                     | 49.6                  |
| pCON  | CE31        |          | M   | C      | 0.0                                                                     | 0.0                    |                        |                          |                   |                     |                    |                      |                    |                      |                                   |                          |                      |                        |                    |                      |                     |                       |                    |                      |                     |                       |
| pCON  | CE32        |          | F   | C      | 0.0                                                                     | 0.0                    |                        |                          |                   |                     |                    |                      |                    |                      |                                   |                          |                      |                        |                    |                      |                     |                       |                    |                      |                     |                       |
| pCON  | CE33        |          | F   | C      | 0.0                                                                     | 0.0                    |                        |                          |                   |                     |                    |                      |                    |                      |                                   |                          |                      |                        |                    |                      |                     |                       |                    |                      |                     |                       |
| pCON  | CE34        |          | M   | C      | 0.0                                                                     | 0.0                    |                        |                          |                   |                     |                    |                      |                    |                      |                                   |                          |                      |                        |                    |                      |                     |                       |                    |                      |                     |                       |
| pKO   | ME1         | L        | F   | D      | 47.5                                                                    | 47.7                   | 0.0                    | 0.0                      | 0.0               | 0.0                 | 0.0                | 0.0                  |                    |                      | 51.5                              | 53.7                     | 45.5                 | 52.9                   | 53.1               | 50.8                 | 90.7                | 83.3                  | 49.3               | 44.6                 | 40.1                | 40.1                  |
| pKO   | ME2         |          | M   | D      | 0.0                                                                     | 0.0                    | 0.0                    | 0.0                      | 0.0               | 0.0                 | 0.0                | 0.0                  |                    |                      | 47.5                              | 46.5                     | 42.4                 | 44.1                   | 52.2               | 48.3                 | 50.2                | 51.3                  | 58.0               | 43.6                 | 46.4                | 40.8                  |
| pKO   | ME3         |          | F   | D      | 0.0                                                                     | 0.0                    | 0.0                    | 0.0                      | 0.0               | 0.0                 | 0.0                | 0.0                  |                    |                      | 49.4                              | 56.5                     | 42.9                 | 47.1                   | 52.1               | 49.5                 | 54.1                | 47.2                  | 57.9               | 45.7                 | 45.1                | 37.9                  |
| pKO   | ME4         |          | F   | D      | 6.1                                                                     | 8.5                    | 0.0                    | 0.0                      | 0.0               | 0.0                 | 0.0                | 0.0                  |                    |                      | 51.5                              | 53.7                     | 38.5                 | 39.8                   | 52.4               | 50.4                 | 53.2                | 47.6                  | 51.5               | 42.0                 | 42.8                | 37.5                  |
| pKO   | ME6         |          | F   | D      | 0.0                                                                     | 0.0                    | 0.0                    | 0.0                      | 0.0               | 0.0                 | 0.0                | 0.0                  |                    |                      | 52.8                              | 57.4                     | 44.4                 | 52.8                   | 55.9               | 51.9                 | 49.3                | 46.2                  | 51.7               | 43.5                 | 43.9                | 43.2                  |
| pKO   | ME7         |          | F   | D      | 0.0                                                                     | 0.0                    | 0.0                    | 0.0                      | 0.0               | 0.0                 | 0.0                | 0.0                  |                    |                      | 52.7                              | 47.1                     | 45.6                 | 58.0                   | 54.2               | 49.2                 | 51.0                | 44.5                  | 51.3               | 44.8                 | 47.6                | 36.0                  |
| pKO   | ME8         | M        | M   | D      | 12.6                                                                    | 33.5                   | 0.0                    | 0.0                      | 0.0               | 0.0                 | 0.0                | 0.0                  | 0.0                |                      | 53.1                              | 52.1                     | 43.9                 | 50.2                   | 54.5               | 54.3                 | 62.4                | 66.3                  | 53.5               | 44.7                 | 45.1                | 43.4                  |
| pKO   | ME24        |          | F   | E      | 0.0                                                                     | 0.0                    | 0.0                    | 0.0                      | 0.0               | 0.0                 | 0.0                | 0.0                  |                    |                      | 50.8                              | 47.5                     | 50.3                 | 44.5                   | 56.4               |                      | 48.7                | 46.3                  | 52.1               | 42.6                 | 43.6                | 39.6                  |
| pKO   | ME25        |          | F   | F      | 0.0                                                                     | 0.0                    |                        |                          | 0.0               | 0.0                 | 0.0                | 0.0                  | 0.0                | 0.0                  | 51.7                              | 48.9                     | 43.5                 | 50.2                   | 96.2               | 77.5                 | 54.2                | 49.7                  | 52.9               | 45.7                 | 45.1                | 40.7                  |
| pKO   | ME26        |          | F   | F      | 0.0                                                                     | 0.0                    |                        |                          | 0.0               | 0.0                 | 0.0                | 0.0                  |                    |                      | 53.1                              | 54.0                     | 46.5                 | 51.6                   | 51.2               | 48.7                 | 51.9                | 52.3                  | 53.6               | 44.2                 | 45.7                | 42.9                  |
| pKO   | ME28        |          | F   | F      | 0.0                                                                     | 0.0                    | 0.0                    | 0.0                      | 0.0               | 0.0                 | 0.0                | 0.0                  | 0.0                |                      | 57.5                              | 47.0                     | 66.3                 | 38.2                   | 59.0               | 46.8                 | 55.4                | 45.0                  | 54.9               | 41.3                 | 45.6                | 38.7                  |
| pKO   | ME29        | N        | M   | F      | 34.6                                                                    | 31.6                   | 0.0                    | 0.0                      | 0.0               | 0.0                 | 0.0                | 0.0                  | 0.0                | 0.0                  | 47.0                              | 45.3                     | 43.5                 |                        | 56.9               | 48.3                 | 84.4                | 80.0                  | 54.8               | 41.5                 | 52.6                | 39.1                  |
| pKO   | ME30        |          | M   | F      | 0.0                                                                     | 0.0                    | 0.0                    | 0.0                      | 0.0               | 0.0                 | 0.0                | 0.0                  | 0.0                | 0.0                  | 51.6                              | 43.8                     | 46.5                 | 44.6                   | 51.8               | 47.1                 | 47.6                | 45.5                  | 49.3               | 42.4                 | 48.5                | 39.5                  |
| pKO   | ME32        |          | M   | F      | 0.0                                                                     | 0.0                    | 0.0                    | 0.0                      | 0.0               | 0.0                 | 0.0                | 0.0                  | 0.0                | 0.0                  | 53.1                              | 55.7                     | 46.3                 | 40.2                   | 54.7               | 48.0                 | 48.6                | 45.6                  | 52.8               | 42.8                 | 47.2                | 41.3                  |
| pKO   | ME34        | O        | M   | G      | 19.6                                                                    | 28.0                   | 0.0                    | 0.0                      | 0.0               | 0.0                 | 0.0                | 0.0                  | 0.0                | 0.0                  | 53.2                              | 50.4                     | 50.7                 | 46.0                   | 53.4               | 49.4                 | 61.0                | 58.1                  | 53.2               | 45.7                 | 48.5                | 42.8                  |
| pKO   | ME35        |          | F   | G      | 0.0                                                                     | 0.0                    | 0.0                    | 0.0                      | 0.0               | 0.0                 | 0.0                | 0.0                  | 0.0                | 0.0                  | 53.5                              | 48.7                     | 50.0                 | 47.9                   | 53.6               | 52.2                 | 50.7                | 49.8                  | 53.2               | 51.4                 | 47.3                | 43.9                  |
| pKO   | ME38        |          | F   | G      | 0.0                                                                     | 0.0                    | 0.0                    | 0.0                      | 0.0               | 0.0                 | 0.0                | 0.0                  | 0.0                | 0.0                  | 55.3                              | 52.1                     | 47.8                 | 53.9                   | 53.9               | 52.8                 | 50.5                | 48.7                  | 53.3               | 45.7                 | 46.6                | 43.8                  |
| pKO   | ME41        |          | F   | G      | 0.0                                                                     | 0.0                    | 0.0                    | 0.0                      | 0.0               | 0.0                 | 0.0                | 0.0                  | 0.0                | 0.0                  | 53.9                              | 50.7                     | 49.9                 | 55.0                   | 54.8               | 53.2                 | 50.9                | 49.1                  | 55.9               | 46.7                 | 46.1                | 42.7                  |
| pKO   | ME43        |          | M   | H      | 0.0                                                                     | 0.0                    |                        |                          |                   | 0.0                 |                    |                      |                    |                      | 54.9                              | 54.7                     | 52.1                 | 50.9                   | 54.9               | 52.1                 | 55.4                | 50.9                  | 59.8               | 51.4                 | 50.4                | 47.0                  |
| pKO   | ME44        | P        | F   | H      | 36.0                                                                    | 24.2                   |                        |                          |                   | 0.0                 |                    |                      |                    |                      | 55.7                              | 57.3                     | 48.2                 | 55.9                   | 51.0               | 53.0                 | 84.9                | 92.3                  | 56.9               | 60.3                 | 46.4                | 48.9                  |
| pKO   | ME46        | Q        | F   | H      | 21.8                                                                    | 26.4                   |                        |                          |                   |                     |                    |                      |                    |                      | 57.1                              | 56.9                     | 50.1                 | 52.3                   | 54.4               | 52.4                 | 64.7                | 59.1                  | 64.0               | 54.4                 | 47.4                | 46.2                  |
| pKO   | ME48        |          | M   | H      | 0.0                                                                     | 0.0                    |                        |                          |                   |                     |                    |                      |                    |                      | 57.7                              | 55.6                     | 52.7                 | 55.1                   | 53.3               | 54.9                 | 54.1                | 53.0                  | 58.1               | 53.5                 | 47.2                | 44.4                  |
| pKO   | ME50        |          | F   | H      | 0.0                                                                     | 0.0                    |                        |                          |                   |                     |                    |                      |                    |                      | 53.5                              | 52.5                     | 50.8                 | 59.8                   | 53.9               | 52.5                 | 55.4                | 52.0                  | 61.6               | 52.6                 | 50.1                |                       |
| pKO   | ME52        |          | F   | I      | 0.0                                                                     | 0.0                    |                        |                          |                   |                     |                    |                      |                    |                      | 49.5                              | 49.8                     | 45.7                 | 48.7                   | 93.7               | 90.3                 | 50.5                | 49.3                  | 47.9               | 42.5                 | 46.3                | 42.5                  |
| pKO   | ME54        |          | M   | I      | 0.0                                                                     | 0.0                    |                        |                          |                   |                     |                    |                      |                    |                      | 47.8                              | 55.0                     | 42.8                 | 52.7                   | 48.1               | 48.9                 | 48.3                | 50.7                  | 47.7               | 42.7                 | 42.4                | 37.7                  |
| pKO   | ME55        |          | F   | I      | 0.0                                                                     | 0.0                    |                        |                          |                   |                     |                    |                      |                    |                      | 46.6                              | 50.7                     | 39.2                 | 42.8                   | 45.0               | 50.0                 | 48.6                | 51.4                  | 40.1               | 48.2                 | 38.0                | 41.2                  |
| pKO   | ME56        | R        | F   | I      | 39.0                                                                    | 37.5                   |                        |                          |                   |                     |                    |                      |                    |                      | 49.1                              | 52.0                     | 42.3                 | 51.1                   | 47.2               | 46.2                 | 88.9                | 82.2                  | 51.7               | 41.2                 | 42.3                | 36.4                  |
| pKO   | ME57        |          | M   | I      | 0.0                                                                     | 0.0                    |                        |                          |                   |                     |                    |                      |                    |                      | 49.4                              | 50.1                     | 41.8                 | 39.6                   | 48.0               | 47.2                 | 49.5                | 43.6                  | 49.1               | 46.5                 | 42.4                | 41.2                  |
| pKO   | ME63        |          | F   | J      | 0.0                                                                     | 0.0                    |                        |                          |                   |                     |                    |                      |                    |                      | 51.3                              | 49.8                     | 46.9                 | 42.5                   | 49.1               | 46.5                 | 52.1                | 42.9                  | 51.9               | 37.8                 | 48.8                | 39.2                  |



Table S8: List of primers used for each assay in this study.

| Gene/Region          | Primer                              | Primer Sequence                             | Assay                                           | References                                                                                                                                                                                                                                    |
|----------------------|-------------------------------------|---------------------------------------------|-------------------------------------------------|-----------------------------------------------------------------------------------------------------------------------------------------------------------------------------------------------------------------------------------------------|
| <i>Tet1</i>          | 13037                               | TCAGGGAGCTCATGGAGACTA                       | Tet1 Genotyping                                 | The Jackson Laboratory<br>( <a href="https://www2.jax.org/protocolsdb/?p=116.5.0:NO:5:P5_M:ASTER_PROTOCOL_ID:P5_JRS_CODE:25442.017358">https://www2.jax.org/protocolsdb/?p=116.5.0:NO:5:P5_M:ASTER_PROTOCOL_ID:P5_JRS_CODE:25442.017358</a> ) |
| <i>Tet1</i>          | 13038                               | TTAAAGCATGGGTGGGAGTC                        | Tet1 Genotyping                                 |                                                                                                                                                                                                                                               |
| <i>Tet1</i>          | 13039                               | AACTGATTCCCTTCGTGCAG                        | Tet1 Genotyping                                 |                                                                                                                                                                                                                                               |
| <i>Kdm5c/Kdm5d</i>   | <i>Smc1</i>                         | TGAAGCTTTGGCTTTGAG                          | Sex Genotyping                                  | (Jay and Claudio, 2013)                                                                                                                                                                                                                       |
| <i>Kdm5c/Kdm5d</i>   | <i>Smc2</i>                         | CCACTGCCAAATCTTTGG                          | Sex Genotyping                                  |                                                                                                                                                                                                                                               |
| <i>H19</i>           | <i>H19 F</i>                        | GTCTCGAAGAGCTCGGACTG                        | qPCR                                            | (Thorvaldsen et al., 2006)                                                                                                                                                                                                                    |
| <i>H19</i>           | <i>H19 R</i>                        | ACTGGCAGGCACATCCAC                          | qPCR                                            |                                                                                                                                                                                                                                               |
| <i>Igf2</i>          | <i>Igf2 F</i>                       | CGCTTCAGTTTCTCTGTTCG                        | qPCR                                            | (Lin et al., 2011)                                                                                                                                                                                                                            |
| <i>Igf2</i>          | <i>Igf2 R</i>                       | GCAGCACTCTCCACGATG                          | qPCR                                            |                                                                                                                                                                                                                                               |
| <i>Meg3/Gli2</i>     | <i>Meg3 F</i>                       | TTGCTGTTGTGCTCAGGTTT                        | qPCR                                            |                                                                                                                                                                                                                                               |
| <i>Meg3/Gli2</i>     | <i>Meg3 R</i>                       | ATCCTGGGGTCCCTCAGTCTT                       | qPCR                                            | (Lin et al., 2011)                                                                                                                                                                                                                            |
| <i>Dlk1</i>          | <i>Dlk1 F</i>                       | CGGGAAATCTCTCGAAATAG                        | qPCR                                            |                                                                                                                                                                                                                                               |
| <i>Dlk1</i>          | <i>Dlk1 R</i>                       | TGTGAGGAGCATTCGTACT                         | qPCR                                            | (Bougault et al., 2008)                                                                                                                                                                                                                       |
| <i>Rplp0</i>         | <i>Arppo F</i>                      | TCCCCTTACTGAAAAGGTCAG                       | qPCR                                            |                                                                                                                                                                                                                                               |
| <i>Rplp0</i>         | <i>Arppo R</i>                      | TCCGACTCTTCCCTTGCTTC                        | qPCR                                            | (Bougault et al., 2008)                                                                                                                                                                                                                       |
| <i>Rpl13a</i>        | <i>Rpl13a F</i>                     | ATCCCTCCACCCTATGACAA                        | qPCR                                            |                                                                                                                                                                                                                                               |
| <i>Rpl13a</i>        | <i>Rpl13a R</i>                     | GCCCCAGGTAAGCAAACTT                         | qPCR                                            | (Plasschaert and Bartolomei, 2015)                                                                                                                                                                                                            |
| <i>Nono</i>          | <i>Nono F</i>                       | GCTCGTGAGAAGCTGGAGAT                        | qPCR                                            |                                                                                                                                                                                                                                               |
| <i>Nono</i>          | <i>Nono R</i>                       | TTCTTGACCTCATCAAAATCC                       | qPCR                                            | (Thorvaldsen et al., 2006)                                                                                                                                                                                                                    |
| <i>H19</i>           | HE2 (F)                             | TGATGGAGAGGACAGAAAGG                        | Allele-Specific Expression                      |                                                                                                                                                                                                                                               |
| <i>H19</i>           | HE4 (R)                             | TTGATTCAGAACGACGCGAC                        | Allele-Specific Expression                      |                                                                                                                                                                                                                                               |
| <i>Igf2</i>          | <i>Igf2-18</i>                      | ATCTGTGACCTCTCTTGTAGCAGG                    | Allele-Specific Expression                      | (Fortier et al., 2008)                                                                                                                                                                                                                        |
| <i>Igf2</i>          | <i>Igf2-20</i>                      | GGGTTGTTTAGAGCCAATCAA                       | Allele-Specific Expression                      |                                                                                                                                                                                                                                               |
| <i>Cdkn1c</i>        | p57-L                               | GCCAATGCGAAGCGGTGCG                         | Allele-Specific Expression                      | (Weaver et al., 2010)                                                                                                                                                                                                                         |
| <i>Cdkn1c</i>        | p57-4                               | TACACCTTGGGACGACTACTCC                      | Allele-Specific Expression                      |                                                                                                                                                                                                                                               |
| <i>Peg3</i>          | PG4                                 | ATGCCACTCCCTCAGCG                           | Allele-Specific Expression                      | (Bhatnagar et al., 2014)                                                                                                                                                                                                                      |
| <i>Peg3</i>          | PG7                                 | GCTCATCTTGTGAACCTTG                         | Allele-Specific Expression                      |                                                                                                                                                                                                                                               |
| <i>Kcnq1ot1</i>      | Lit1 F                              | ATTGGGAAGTGGGGTGGAGGC                       | Allele-Specific Expression                      | (Rivera et al., 2008)                                                                                                                                                                                                                         |
| <i>Kcnq1ot1</i>      | Lit1 R                              | GGCACACGATGAGAAAAGATTG                      | Allele-Specific Expression                      |                                                                                                                                                                                                                                               |
| <i>Snrpn</i>         | Sn1 (F)                             | CTCCACCAGAAATAGAGGC                         | Allele-Specific Expression (Light Cycler)       | (Szabo and Mann, 1995)                                                                                                                                                                                                                        |
| <i>Snrpn</i>         | Sn3 (R)                             | GCAGTAGAGGGGTCAAAGC                         | Allele-Specific Expression (Light Cycler)       |                                                                                                                                                                                                                                               |
| <i>Snrpn</i>         | SnMut (Snrpn sensor probe)          | GAACATTGTAGGGGAAGAGAA-fluorescein           | Allele-Specific Expression (Light Cycler Probe) |                                                                                                                                                                                                                                               |
| <i>Snrpn</i>         | SnAnc (Snrpn anchor probe)          | LC-Red640-GGCTGAGATTTATCAACTGTATCTTAGGGTC-B | Allele-Specific Expression (Light Cycler Probe) |                                                                                                                                                                                                                                               |
| <i>H19/Igf2</i> ICR  | <i>H19/Igf2</i> ICR F               | GGGTAGGATATATGTAATTTTATAGGTTG               | Pyrosequencing PCR                              |                                                                                                                                                                                                                                               |
| <i>H19/Igf2</i> ICR  | <i>H19/Igf2</i> ICR R-biotinylated  | CTCATAAAACCCATAACTATAAATCAT                 | Pyrosequencing PCR                              |                                                                                                                                                                                                                                               |
| <i>H19/Igf2</i> ICR  | <i>H19/Igf2</i> ICR Sequencing      | TCTAAGATTAGGGTTTGT                          | Pyrosequencing Sequencing Primer                |                                                                                                                                                                                                                                               |
| <i>IG-DMR</i>        | <i>IG-DMR F</i>                     | GTGGTTTGTATGGGTAAGTTT                       | Pyrosequencing PCR                              |                                                                                                                                                                                                                                               |
| <i>IG-DMR</i>        | <i>IG-DMR R-biotinylated</i>        | CCCTTCCCTCACTCAAATAATTA                     | Pyrosequencing PCR                              |                                                                                                                                                                                                                                               |
| <i>IG-DMR</i>        | <i>IG-DMR sequencing</i>            | GTTATGGATTGGTGTAAAG                         | Pyrosequencing Sequencing Primer                |                                                                                                                                                                                                                                               |
| <i>Snrpn</i> ICR     | <i>Snrpn F</i>                      | GGTAGTTGTTTTTGGTAGGATAT                     | Pyrosequencing PCR                              | (de Waal et al., 2014)                                                                                                                                                                                                                        |
| <i>Snrpn</i> ICR     | <i>Snrpn R- biotinylated</i>        | ACTAAAATCCACAACCCAACTAACCT                  | Pyrosequencing PCR                              |                                                                                                                                                                                                                                               |
| <i>Snrpn</i> ICR     | <i>Snrpn Sequencing</i>             | GTGTAGTTATTTGGGTA                           | Pyrosequencing Sequencing Primer                |                                                                                                                                                                                                                                               |
| <i>Peg3</i> ICR      | <i>Peg3 F</i>                       | GTTTTTAAGGGTAATGATAAGG                      | Pyrosequencing PCR                              |                                                                                                                                                                                                                                               |
| <i>Peg3</i> ICR      | <i>Peg3 R- biotinylated</i>         | CCCTATCACCTAAATAACATCCC                     | Pyrosequencing PCR                              |                                                                                                                                                                                                                                               |
| <i>Peg3</i> ICR      | <i>Peg3 Sequencing</i>              | AATTGATAAGGTTGTAGATT                        | Pyrosequencing Sequencing Primer                |                                                                                                                                                                                                                                               |
| <i>KvDMR</i>         | <i>KvDMR F</i>                      | TTTTGTGTGATTTTATTTGGAGAGT                   | Pyrosequencing PCR                              |                                                                                                                                                                                                                                               |
| <i>KvDMR</i>         | <i>KvDMR R-biotinylated</i>         | CCTCAAACCCACTACT                            | Pyrosequencing PCR                              |                                                                                                                                                                                                                                               |
| <i>KvDMR</i>         | <i>KvDMR Sequencing</i>             | GTAAGTATTTAAGGTTAGAAGTAGA                   | Pyrosequencing Sequencing Primer                |                                                                                                                                                                                                                                               |
| <i>Peg1/Mest</i> ICR | <i>Peg1/Mest</i> ICR F              | GGAGGTTTTATATAAGTATTTGTTTTT                 | Pyrosequencing PCR                              |                                                                                                                                                                                                                                               |
| <i>Peg1/Mest</i> ICR | <i>Peg1/Mest</i> ICR R-biotinylated | ACCACCAACTAACACTAAA                         | Pyrosequencing PCR                              |                                                                                                                                                                                                                                               |
| <i>Peg1/Mest</i> ICR | <i>Peg1/Mest</i> Sequencing         | GGTTTTATATAAGTATTTGTTTTT                    | Pyrosequencing Sequencing Primer                | (Mann et al., 2004)                                                                                                                                                                                                                           |
| <i>Peg3</i> ICR      | <i>Peg3A-BL</i> (1st round)         | TTTTGATAAGGAGGTTTTT                         | Bisulfite Sequencing PCR                        |                                                                                                                                                                                                                                               |
| <i>Peg3</i> ICR      | <i>Peg3D-BL</i> (1st round)         | ACTCTAATATCCACTATAATA                       | Bisulfite Sequencing PCR                        |                                                                                                                                                                                                                                               |
| <i>Peg3</i> ICR      | <i>Peg3B-BL</i> (2nd round)         | AGTGTGGGTGATTTAGATT                         | Bisulfite Sequencing PCR                        |                                                                                                                                                                                                                                               |
| <i>Peg3</i> ICR      | <i>Peg3C-BL</i> (2nd round)         | TAACAAAACCTCTACATCATC                       | Bisulfite Sequencing PCR                        | (Market-Velker et al., 2010)                                                                                                                                                                                                                  |
| <i>H19/Igf2</i> ICR  | BMsp211 (H19 A) (1st round)         | GAGTATTTAGGAGGATAAGANTT                     | Bisulfite Sequencing PCR                        | (Tremblay et al., 1997)                                                                                                                                                                                                                       |
| <i>H19/Igf2</i> ICR  | BHha113 (H19 D) (1st round)         | ATCAAAAACCTAACATAAACCCCT                    | Bisulfite Sequencing PCR                        |                                                                                                                                                                                                                                               |
| <i>H19/Igf2</i> ICR  | Bmsp212c (H19 B) (2nd round)        | GTAAGGAGATATGTTTTATTTTGG                    | Bisulfite Sequencing PCR                        | (Ideraabduallah et al., 2014)                                                                                                                                                                                                                 |
| <i>H19/Igf2</i> ICR  | BHha114ct (H19 C) (second round)    | CTAACCTCATAAAAACCCATAACTAT                  | Bisulfite Sequencing PCR                        |                                                                                                                                                                                                                                               |

**Table S9: List of PCR cycling conditions for each PCR used in this study.**

| Assay                                | Thermal Cycler                                    | PCR conditions                                                                                                                                                                                                              | Annealing Temperature (TA), °C | No. of cycles                          |
|--------------------------------------|---------------------------------------------------|-----------------------------------------------------------------------------------------------------------------------------------------------------------------------------------------------------------------------------|--------------------------------|----------------------------------------|
| Tet1                                 | Thermo Electron Hybaid PCR Express Thermal Cycler | 2 min denaturation at 94°C; number of cycles of [15 s at 94°C, 15 s at TA, and 40 s at 72°C]                                                                                                                                | 60                             | 35                                     |
| Smc                                  | BioRad C1000 Touch Thermal Cycler                 | 5 min denaturation at 95°C; number of cycles of [15 s at 95°C, 1 min at TA, and 1 min at 72°C]; 7 min extension at 72°C                                                                                                     | 55                             | 40                                     |
| qPCR: All genes                      | 7900HT Fast Real-Time PCR System                  | 2 min hold at 50°C; 10 min hold at 95°C; number of cycles of [15 s at 95°C, 1 min at 60°C]; Melting Curve: 95°C for 15 s, 60°C for 15 s, 95°C for 15 s.                                                                     | -                              | 40                                     |
| Allele-Specific <i>H19</i>           | BioRad C1000 Touch Thermal Cycler                 | 2 min denaturation at 95°C; number of cycles of [15 s at 95°C, 20 s at TA, and 20 s at 72°C]; 5 min extension at 72°C                                                                                                       | 58                             | 21-31                                  |
| Allele-Specific <i>Igf2</i>          | BioRad C1000 Touch Thermal Cycler                 | 2 min denaturation at 94°C; number of cycles of [20 s at 94°C, 20 s at TA, and 20 s at 72°C]; 5 min extension at 72°C                                                                                                       | 60                             | 24-32                                  |
| Allele-Specific <i>Cdkn1c</i>        | BioRad C1000 Touch Thermal Cycler                 | 2 min denaturation at 95°C; number of cycles of [15 s at 95°C, 20 s at TA, and 20 s at 72°C]; 5 min extension at 72°C                                                                                                       | 60                             | 25-30                                  |
| Allele-Specific <i>Peg3</i>          | BioRad C1000 Touch Thermal Cycler                 | 2 min denaturation at 94°C; number of cycles of [20 s at 95°C, 20 s at TA, and 20 s at 72°C]; 5 min extension at 72°C                                                                                                       | 60                             | 29-34                                  |
| Allele-Specific <i>Lit1/Kcnq1ot1</i> | BioRad C1000 Touch Thermal Cycler                 | 2 min denaturation at 95°C; number of cycles of [20 s at 95°C, 20 s at TA, and 50 s at 72°C]; 5 min extension at 72°C                                                                                                       | 64                             | 32-34                                  |
| Allele-Specific <i>Snrpn</i>         | Roche LightCycler 1.5                             | Amplification: 95°C 1 s (20°C/s), 50°C, 15 s (20°C/s), 72°C, 6 s (20°C/s); Melt: 95°C, 4 min (20°C/s), 35°C, 3 min (20°C/s), 40°C, 1 min (20°C/s), 45°C, 1 min (20°C/s), 85°C, 0 s, (0.5°C/s); Cooling: 40°C 30 s, (20°C/s) | -                              | Amplification: 45; Melt: 3; Cooling: 1 |
| Pyrosequencing                       | BioRad C1000 Touch Thermal Cycler                 | (Hur et al., 2016)                                                                                                                                                                                                          |                                |                                        |
| <i>Peg3</i> Bisulfite                | BioRad C1000 Touch Thermal Cycler                 | First Round: 5 min denaturation at 94°C; number of cycles of [94°C for 30 s, TA for 30 s, 72°C for 1 min]; 10 min extension at 72°C                                                                                         | 50                             | 25                                     |
|                                      |                                                   | Second Round: 5 min denaturation at 94°C; number of cycles of [94°C for 30 s, TA for 30 s, 72°C for 1 min]; 10 min extension at 72°C                                                                                        | 53                             | 35                                     |
| <i>H19</i> Bisulfite                 | BioRad C1000 Touch Thermal Cycler                 | First Round: 5 min denaturation at 94°C; number of cycles of [94°C for 30 s, TA for 30 s, 72°C for 1 min]; 10 min extension at 72°C                                                                                         | 50                             | 25                                     |
|                                      |                                                   | Second Round: 5 min denaturation at 94°C; number of cycles of [94°C for 30 s, TA for 30 s, 72°C for 1 min]; 10 min extension at 72°C                                                                                        | 58                             | 35                                     |

## Supplemental References

- Bhatnagar, S., Zhu, X., Ou, J., Lin, L., Chamberlain, L., Zhu, L. J., Wajapeyee, N. and Green, M. R.** (2014). Genetic and pharmacological reactivation of the mammalian inactive X chromosome. *Proc. Natl. Acad. Sci.* **111**, 12591–12598.
- Bougault, C., Paumier, A., Aubert-Foucher, E. and Mallein-Gerin, F.** (2008). Molecular analysis of chondrocytes cultured in agarose in response to dynamic compression. *BMC Biotechnol.* **8**, 71.
- De Waal, E., Mak, W., Calhoun, S., Stein, P., Ord, T., Krapp, C., Coutifaris, C., Schultz, R. M. and Bartolomei, M. S.** (2014). In Vitro Culture Increases the Frequency of Stochastic Epigenetic Errors at Imprinted Genes in Placental Tissues from Mouse Concepti Produced Through Assisted Reproductive Technologies. *Biol. Reprod.* **90**, 22–22.
- Fortier, A. L., Lopes, F. L., Darricarrère, N., Martel, J. and Trasler, J. M.** (2008). Superovulation alters the expression of imprinted genes in the midgestation mouse placenta. *Hum. Mol. Genet.* **17**, 1653–1665.
- Hur, S. K., Freschi, A., Ideraabdullah, F., Thorvaldsen, J. L., Luense, L. J., Weller, A. H., Berger, S. L., Cerrato, F., Riccio, A. and Bartolomei, M. S.** (2016). Humanized *H19/Igf2* locus reveals diverged imprinting mechanism between mouse and human and reflects Silver–Russell syndrome phenotypes. *Proc. Natl. Acad. Sci.* **113**, 10938–10943.
- Ideraabdullah, F. Y., Thorvaldsen, J. L., Myers, J. A. and Bartolomei, M. S.** (2014). Tissue-specific insulator function at *H19/Igf2* revealed by deletions at the imprinting control region. *Hum. Mol. Genet.* **23**, 6246–6259.
- Jay, F. and Ciaudo, C.** (2013). An RNA tool kit to study the status of mouse ES cells: Sex determination and stemness. *Methods* **63**, 85–92.
- Lin, S., Ferguson-Smith, A. C., Schultz, R. M. and Bartolomei, M. S.** (2011). Nonallelic Transcriptional Roles of CTCF and Cohesins at Imprinted Loci. *Mol. Cell. Biol.* **31**, 3094–3104.
- Mann, M. R., Lee, S. S., Doherty, A. S., Verona, R. I., Nolen, L. D., Schultz, R. M. and Bartolomei, M. S.** (2004). Selective loss of imprinting in the placenta following preimplantation development in culture. *Development* **131**, 3727–3735.
- Market-Velker, B. A., Fernandes, A. D. and Mann, M. R. W.** (2010). Side-by-side comparison of five commercial media systems in a mouse model: suboptimal in vitro culture interferes with imprint maintenance. *Biol. Reprod.* **83**, 938–950.
- Plasschaert, R. N. and Bartolomei, M. S.** (2015). Tissue-specific regulation and function of *Grb10* during growth and neuronal commitment. *Proc. Natl. Acad. Sci.* **112**, 6841–6847.
- Rivera, R. M., Stein, P., Weaver, J. R., Mager, J., Schultz, R. M. and Bartolomei, M. S.** (2008). Manipulations of mouse embryos prior to implantation result in aberrant expression of imprinted genes on day 9.5 of development. *Hum. Mol. Genet.* **17**, 1–14.
- Szabo, P. E. and Mann, J. R.** (1995). Biallelic expression of imprinted genes in the mouse germ line: Implications for erasure, establishment, and mechanisms of genomic imprinting. *Genes Dev.* **9**, 1857–1868.
- Thorvaldsen, J. L., Fedoriw, A. M., Nguyen, S. and Bartolomei, M. S.** (2006). Developmental Profile of *H19* Differentially Methylated Domain (DMD) Deletion Alleles Reveals Multiple Roles of the DMD in Regulating Allelic Expression and DNA Methylation at the Imprinted *H19/Igf2* Locus. *Mol. Cell. Biol.* **26**, 1245–1258.
- Tremblay, K. D., Duran, K. L. and Bartolomei, M. S.** (1997). A 5J 2-Kilobase-Pair Region of the Imprinted Mouse *H19* Gene Exhibits Exclusive Paternal Methylation throughout Development. *Hum. Mol. Genet.* **17**, 4322–4329.
- Weaver, J. R., Sarkisian, G., Krapp, C., Mager, J., Mann, M. R. W. and Bartolomei, M. S.** (2010). Domain-Specific Response of Imprinted Genes to Reduced DNMT1. *Mol. Cell. Biol.* **30**, 3916–3928.
